# Supplementary material for: Obstetric perineal tears, sexual function and dyspareunia among primiparous women 12 months postpartum: a prospective cohort study
Source: PubMed Central journal article supplement — BMJ Open. 2019 Dec 16;9(12):e032368. doi: 10.1136/bmjopen-2019-032368 (PMC6937116; doi:10.1136/bmjopen-2019-032368), 2019-12-16
Supplement: bmjopen-2019-032368.draft_revisions.pdf [file bmjopen-2019-032368.draft_revisions.pdf]

# BMJ Open

BMJ Open is committed to open peer review. As part of this commitment we make the peer review history of every article we publish publicly available.

When an article is published we post the peer reviewers' comments and the authors' responses online. We also post the versions of the paper that were used during peer review. These are the versions that the peer review comments apply to.

The versions of the paper that follow are the versions that were submitted during the peer review process. They are not the versions of record or the final published versions. They should not be cited or distributed as the published version of this manuscript.

BMJ Open is an open access journal and the full, final, typeset and author-corrected version of record of the manuscript is available on our site with no access controls, subscription charges or pay-per-view fees (<http://bmjopen.bmj.com>).

If you have any questions on BMJ Open's open peer review process please email [info.bmjopen@bmj.com](mailto:info.bmjopen@bmj.com)

# BMJ Open

## Obstetric perineal ruptures, sexual function and dyspareunia among primiparous women 12 months postpartum: a prospective cohort study

|                               |                                                                                                                                                                                                                                                                                                                                                                                                                                                                                                                                                                                |
|-------------------------------|--------------------------------------------------------------------------------------------------------------------------------------------------------------------------------------------------------------------------------------------------------------------------------------------------------------------------------------------------------------------------------------------------------------------------------------------------------------------------------------------------------------------------------------------------------------------------------|
| Journal:                      | <i>BMJ Open</i>                                                                                                                                                                                                                                                                                                                                                                                                                                                                                                                                                                |
| Manuscript ID                 | bmjopen-2019-032368                                                                                                                                                                                                                                                                                                                                                                                                                                                                                                                                                            |
| Article Type:                 | Research                                                                                                                                                                                                                                                                                                                                                                                                                                                                                                                                                                       |
| Date Submitted by the Author: | 14-Jun-2019                                                                                                                                                                                                                                                                                                                                                                                                                                                                                                                                                                    |
| Complete List of Authors:     | Gommesen, Ditte; University of Southern Denmark, Institute of Clinical Research; Odense University Hospital, Gynaecology and Obstetrics<br>Nøhr, Ellen; University of Southern Denmark, Institute of Clinical Research; Odense University Hospital, Gynaecology and Obstetrics<br>Qvist, Niels; University of Southern Denmark, Institute of Clinical Research; Odense University Hospital, Department of Gastroenterological Surgery<br>Rasch, Vibeke; Odense University Hospital, Gynaecology and Obstetrics; University of Southern Denmark, Institute of Clinical Research |
| Keywords:                     | EPIDEMIOLOGY, Urogynaecology < GYNAECOLOGY, Maternal medicine < OBSTETRICS, SEXUAL MEDICINE                                                                                                                                                                                                                                                                                                                                                                                                                                                                                    |
|                               |                                                                                                                                                                                                                                                                                                                                                                                                                                                                                                                                                                                |

SCHOLARONE™  
Manuscripts

1  
2  
3  
4  
5  
6  
7  
8  
9  
10  
11  
12  
13  
14  
15  
16  
17  
18  
19  
20  
21  
22  
23  
24  
25  
26  
27  
28  
29  
30  
31  
32  
33  
34  
35  
36  
37  
38  
39  
40  
41  
42  
43  
44  
45  
46  
47  
48  
49  
50  
51  
52  
53  
54  
55  
56  
57  
58  
59  
60

1 **Full Title:** Obstetric perineal ruptures, sexual function and dyspareunia among primiparous women  
2 12 months postpartum: a prospective cohort study

3  
4 Ditte Gommesen, MHSc, Midwife and PhD student  
5 Institute of Clinical Research, University of Southern Denmark  
6 OPEN, Odense Patient data Explorative Network, Odense University Hospital  
7 Department of Gynaecology and Obstetrics, Odense University Hospital  
8 J.B. Winsløvs Vej 4, 5000 Odense C, Denmark

9  
10 Ellen Aagaard Nohr, Professor and Consultant Midwife  
11 Institute of Clinical Research, University of Southern Denmark  
12 Department of Gynaecology and Obstetrics, Odense University Hospital  
13 J.B. Winsløvs Vej 4, 5000 Odense C, Denmark

14  
15 Niels Qvist, Professor and Senior Consultant  
16 Institute of Clinical Research, University of Southern Denmark  
17 Department of Gastroenterological Surgery, Odense University Hospital,  
18 J.B. Winsløvs Vej 4, 5000 Odense C, Denmark

19  
20 Vibeke Rasch, Professor and Senior Consultant  
21 Institute of Clinical Research, University of Southern Denmark  
22 Department of Gynaecology and Obstetrics, Odense University Hospital  
23 J.B. Winsløvs Vej 4, 5000 Odense C, Denmark

24

1  
2  
3  
4 25 **Funding:** The study was funded by Odense University Hospitals Research Foundation, The Region  
5  
6 26 of Southern Denmark, University of Southern Denmark, the Department of Gynaecology and  
7  
8 27 Obstetrics, Odense University Hospital, The A.P. Moeller Foundation for the Advancement of  
9  
10 28 Medical Science (grant no.13-93), and **The Danish Association of Midwives**. The funding sources  
11  
12  
13 29 had no influence or involvement in the study.  
14  
15  
16 30

17  
18 31 **Correspondence:** Ditte Gommesen, Department of Gynaecology and Obstetrics, Odense  
19  
20 32 University Hospital, J.B. Winsløvs Vej 4, 5000 Odense C, Denmark.

21  
22  
23 33 Phone number: 0045 29419788

24  
25 34 Email [ditte.gommesen@rsyd.dk](mailto:ditte.gommesen@rsyd.dk)  
26  
27 35

28  
29 36 **Short running title:** Obstetric perineal ruptures, sexual function and dyspareunia.

30  
31 37 **Word count:** 2498 words  
32  
33  
34 38

## 35 36 39 **ABSTRACT**

37  
38 40 **Background/introduction:** Sexuality is an important aspect of human identity and contributes  
39  
40 41 significantly to the quality of life in women as well as in men. Impairment in sexual health after  
41  
42 42 vaginal delivery is a major concern for many women. We aimed to examine the association between  
42  
43 43 degree of perineal rupture and sexual function 12 months postpartum.  
43  
44 44

45  
46 44 **Methods:** A prospective cohort study was conducted at four Danish hospitals between July 2015  
47  
48 45 and January 2019 among 554 primiparous women: 191 with no/labia/first-degree ruptures, 189 with  
49  
50 46 second-degree ruptures, and 174 with third-/fourth-degree ruptures. Baseline data were obtained 2  
51  
52 47 weeks postpartum by a questionnaire and a clinical examination. Sexual function was evaluated 12  
52  
53  
54  
55  
56  
57  
58  
59  
60

1  
2  
3  
4 48 months postpartum by an electronic questionnaire (PISQ-12) and a clinical examination. Main  
5  
6  
7 49 outcomes were total PISQ-12 score and dyspareunia.

8  
9 50 **Results:** The proportion of women with dyspareunia was: 25%, 38% and 53% of women with  
10  
11 51 no/labia-/first-degree, second-degree or third-/fourth-degree ruptures, respectively.

12  
13 52 Compared to women with no/labia-/first-degree ruptures, women with second degree or anal  
14  
15  
16 53 sphincter ruptures had higher risk of **dyspareunia** (aRR 2.05; 95% CI 1.51-2.78 and aRR 2.09;  
17  
18 54 95% CI 1.55-2.81, respectively).

19  
20  
21 55 **Conclusions:** Impairment of sexual health is common among primiparous women after vaginal  
22  
23 56 delivery. At 12 months postpartum more than half of the women with an anal sphincter rupture  
24  
25 57 experienced dyspareunia. Women delivering with no/labia-/first-degree ruptures reported the best  
26  
27  
28 58 outcomes overall. Thus, it is important to minimize the extent of perineal trauma and to counsel  
29  
30 59 about sexuality during and after pregnancy.

## 31 32 60 **Article summary**

33  
34  
35 61 Strengths and limitations of this study:

- 36  
37  
38 62 • The study had a high follow-up rate for both the web-based questionnaire and clinical  
39 63 examination.
- 40 64  
41 65 • The study included both subjective and objective outcome measurements.
- 42 66  
43 67 • All the clinical examinations were performed by the same examiner raising a possible risk of  
44 68 intra observer bias.
- 45 69  
46 70  
47 71 • There was a risk of recall bias as information about pre-pregnancy sexual function was  
48 72 obtained postpartum.
- 49 73  
50 74  
51 75  
52  
53  
54  
55  
56  
57  
58  
59  
60

## 76 INTRODUCTION

77 Sexuality is an important aspect of human identity and contributes significantly to the quality of life  
78 in women as well as in men.<sup>1</sup> Sexual function postpartum is affected by the changes in hormonal  
79 milieu, anatomy, and family structure following childbirth. Dyspareunia and other sexual problems  
80 such as loss of sex drive in the postpartum period is a well-known problem and frequencies of  
81 sexual dysfunction as high as 30-60% three months postpartum and 17-31% six months postpartum  
82 have been reported.<sup>2-7</sup> A large cohort study from Sweden found vaginal or perineal ruptures,  
83 regardless of degree, to be associated with a delay in women's resumption of sexual intercourse,<sup>8</sup>  
84 while about 10% of primiparous women had not yet resumed sexual intercourse six months  
85 postpartum.<sup>3</sup> The causes of sexual dysfunction are multifactorial and the mechanisms are still not  
86 fully understood.<sup>3-5 9</sup> Thus sexual dysfunction remains an unsolved problem for many women.  
87 Among other things, anatomical changes caused by vaginal or perineal ruptures may contribute to  
88 dyspareunia and has important effects on both the timing and quality of the resumption of sexual  
89 relations during the initial postpartum months.<sup>10</sup> The association between obstetrical risk factors and  
90 postpartum sexual function is not yet well described or understood and thus the aim of this study  
91 was to investigate the association between degree of perineal rupture, sexual function and  
92 dyspareunia 12 months postpartum.

## 93 METHODS

### 94 Study setting

95 This study is part of a larger prospective cohort study conducted at two university and two tertiary  
96 hospital units in Denmark, Odense (OUH), Aarhus (AUH), Esbjerg, and Kolding, between July  
97 2015 and January 2019. The inclusion procedure and sample size calculation is described  
98 thoroughly elsewhere.<sup>11</sup>

1  
2  
3  
4  
5  
6  
7  
8  
9  
10  
11  
12  
13  
14  
15  
16  
17  
18  
19  
20  
21  
22  
23  
24  
25  
26  
27  
28  
29  
30  
31  
32  
33  
34  
35  
36  
37  
38  
39  
40  
41  
42  
43  
44  
45  
46  
47  
48  
49  
50  
51  
52  
53  
54  
55  
56  
57  
58  
59  
60

## 100 **Study population**

101 The study involved three groups of women i) 203 women with no/labia/first-degree perineal  
102 ruptures, ii) 200 women with second-degree perineal ruptures and iii) 200 women with third-  
103 /fourth-degree perineal ruptures.

## 104 **Patient and Public Involvement**

105 There was no patient or public involvement in design and conduct of this study.

## 106 **Inclusion and follow-up procedure**

107 Women delivering vaginally, at least 18 years old, able to read and speak Danish were eligible.  
108 After the delivery, they were informed about the study. Further information was sent by e-mail and  
109 the women were invited to participate in a baseline face-to-face interview and clinical examination  
110 16±5 days postpartum, including baseline questionnaires. Written informed consent was obtained at  
111 baseline.<sup>11</sup> At 12 months postpartum, all participants received the same questionnaires  
112 electronically and were invited to a gynaecological examination followed by a three-dimensional  
113 high-resolution anal manometry (3D HRAM). Study data were collected and managed using  
114 REDCap electronic data capture tools hosted at OUH.<sup>12</sup>

## 115 **Outcome measurements**

116 The primary outcome was sexual function. We used the Danish version of the Pelvic Organ  
117 Prolapse/Urinary Incontinence Sexual Function Questionnaire (PISQ-12).<sup>13</sup> The PISQ-12 is a self-  
118 administered, objective and validated questionnaire with scores based on 12 questions to evaluate  
119 sexual function. The score of each item ranges from 0=never to 4=always (reverse scoring for  
120 questions 1, 2, 3 and 4). Missing responses are handled by multiplying the mean of answered items  
121 and the score is valid with up to 2 missing answers.<sup>13</sup> The questionnaire has previously been used to  
122 evaluate sexual function after vaginal delivery.<sup>14 15</sup> We used the total score (range 0-48) with lower  
123 scores indicating better sexual function, and the individual score for question 5; "Do you feel pain

1  
2  
3  
4 124 during sexual intercourse?”. The total score was used as a continuous variable presented as mean  
5  
6  
7 125 and standard deviation (SD) and the single score for question 5 was dichotomized as dyspareunia  
8  
9 126 when answering “sometimes”, “usually” or “always” and no dyspareunia when answering “seldom”  
10  
11 127 or “never”.

## 13 128 **Exposure variables and covariates**

### 15 129 **Degrees of perineal ruptures**

16 130 The degree of perineal rupture was defined according to the Green-top Guideline No. 29.<sup>16</sup> First-  
17  
18 131 degree ruptures were defined as injury to perineal skin and/or vaginal mucosa. Second-degree  
19  
20  
21 132 ruptures were defined as injury to perineum involving perineal muscles but not the anal sphincter.  
22  
23  
24  
25 133 Third-degree ruptures were defined as injury to perineum involving the anal sphincter complex  
26  
27 134 including: Grade 3a rupture with less than 50% of the external anal sphincter (EAS) thickness torn.  
28  
29  
30 135 Grade 3b rupture with more than 50% of EAS thickness torn and Grade 3c ruptures with both EAS  
31  
32 136 and internal anal sphincter (IAS) torn. Fourth-degree ruptures were defined as an injury to perineum  
33  
34 137 involving the anal sphincter complex (EAS and IAS) and anorectal mucosa. Labia ruptures were  
35  
36  
37 138 isolated to the labia. Episiotomies were lateral or mediolateral. Episiotomies equivalent to a second-  
38  
39 139 degree rupture were analyzed independently while episiotomies extending to the anal sphincter  
40  
41 140 muscles were classified as a third- or fourth-degree rupture depending on severity.

### 42 141 **Baseline information**

43  
44  
45 142 At baseline 16±5 days postpartum, a questionnaire was completed providing information about age  
46  
47  
48 143 (years), height (centimetres), smoking status (yes/no), and pregestational BMI (kg/m<sup>2</sup>). Information  
49  
50 144 about pregnancy, birth and the postpartum period was obtained from the obstetric journal and  
51  
52  
53 145 included diabetes mellitus (yes/no), length of active birth and length of the second stage of labour  
54  
55 146 (minutes), operative delivery (yes/no), birthweight (gram) and head circumference (centimetres).  
56  
57  
58  
59  
60



1  
2  
3  
4  
5  
6  
7  
8  
9  
10  
11  
12  
13  
14  
15  
16  
17  
18  
19  
20  
21  
22  
23  
24  
25  
26  
27  
28  
29  
30  
31  
32  
33  
34  
35  
36  
37  
38  
39  
40  
41  
42  
43  
44  
45  
46  
47  
48  
49  
50  
51  
52  
53  
54  
55  
56  
57  
58  
59  
60

The PISQ-12 was likewise completed at baseline providing information about pre-pregnancy sexual function. Question 5 was used and dichotomized as the postpartum score described previously.

### **Clinical examination 12 months postpartum**

Perineal length and strength were evaluated by a gynecological examination and 3D HRAM. All procedures were done by the first author (DG), with the women in the dorsal lithotomy position without bowel preparation. At the gynecological examination, perineal body length was measured in centimeters, from the hymen to the middle of anus during Valsalva maneuver as done in the Pelvic Organ Quantification (POP-Q) system,<sup>17</sup> and used as a dichotomous variable ( $\leq 2$  cm/ $> 2$  cm). Perineal strength was measured by 3D HRAM performed using a rigid probe with 256 pressure sensors arranged in 16 rows (64mm length) with 16 circumferential sensors in each (10.75mm diameter) (Medtronic, Shoreview, MN; USA). Data were analyzed using ManoViewAR software (Medtronic, Minneapolis, MN; USA). A one minute resting period was observed before initiating measurements of anal and rectal pressure in mm Hg during a 20 seconds resting period, maximum squeeze pressure during 3 periods of five seconds each and maximum duration of squeeze in seconds. All three measurements were used as continuous variables.

### **Statistical analyses**

Baseline characteristics according to degree of rupture were described as frequencies for categorical variables. To investigate the association between the degree of perineal rupture and dyspareunia, perineal body length and strength, a relative risk regression by use of a generalized linear model with log-link function and binomial distribution as statistical family was performed with estimates reported as relative risks (RR) with 95% confidence intervals (CI). To investigate the association between the degree of perineal rupture and sexual dysfunction measured as the total PISQ-12 score, a linear regression was performed, and results presented as regression coefficients ( $\beta$ ) with 95% CI. In the adjusted analysis, we controlled for pre-pregnancy dyspareunia, smoking, diabetes and

1  
2  
3  
4  
5  
6  
7  
8  
9  
10  
11  
12  
13  
14  
15  
16  
17  
18  
19  
20  
21  
22  
23  
24  
25  
26  
27  
28  
29  
30  
31  
32  
33  
34  
35  
36  
37  
38  
39  
40  
41  
42  
43  
44  
45  
46  
47  
48  
49  
50  
51  
52  
53  
54  
55  
56  
57  
58  
59  
60

operative delivery as categorical variables and age, BMI, duration of the second stage of labor, duration of active birth and fetal birthweight as continuous variables. These potential confounders were chosen a priori based on directed acyclic graphs generated for the outcome variable using DAGitty v2.3 as graphical tool for analyzing the causal diagrams.<sup>18</sup> The analyses were carried out using STATA statistical software version 15.0.

## RESULTS

### Participants

Initially, a total of 832 women were invited to participate in the study. Of these, 81 declined and 138 could not be reached. This left 613 women completing a written consent and a baseline questionnaire who were booked for a clinical examination 16±5 days postpartum. Ten women withdrew their consent. Thus, the study population comprised 603 women. At the one year follow-up, 554 of the 603 women answered the web-based questionnaire corresponding to 92%, and 485 women had the clinical examination performed corresponding to 80%. Fewer women (n=482) underwent 3D HRAM either due to rejection of the procedure or due to technical problems with the equipment. Due to more than two missing answers, 13 women were excluded from analyses of total PISQ-12 score.

### Characteristics according to degree of rupture

Women sustaining third- or fourth-degree ruptures were on average 0.5 years older than women sustaining second-degree ruptures and 1.2 years older than women sustaining no/labia/first-degree ruptures (Table 1).

Table 1: Characteristics according to degree of rupture among primiparous women (n=554).

|                                               | Total      | Group 1<br>(No/labia/<br>1 <sup>st</sup> degree) | Group 2<br>(2 <sup>nd</sup> degree) | Group 3<br>(3 <sup>rd</sup> /4 <sup>th</sup> degree) |
|-----------------------------------------------|------------|--------------------------------------------------|-------------------------------------|------------------------------------------------------|
|                                               | (n=554)    | (n=191)                                          | (n=189)                             | (n=174)                                              |
|                                               | n (%)      | n (%)                                            | n (%)                               | n (%)                                                |
| <b>BMI, pre-pregnancy (kg/m<sup>2</sup>)*</b> |            |                                                  |                                     |                                                      |
| <25                                           | 357 (64.6) | 128 (67.0)                                       | 116 (61.7)                          | 113 (64.9)                                           |
| 25-29.9                                       | 126 (22.8) | 41 (21.5)                                        | 46 (24.5)                           | 39 (22.4)                                            |
| ≥29.9                                         | 70 (12.7)  | 22 (11.5)                                        | 26 (13.8)                           | 22 (12.6)                                            |
| <b>Age at inclusion (years)</b>               |            |                                                  |                                     |                                                      |
| ≤25                                           | 141 (25.5) | 63 (33.0)                                        | 50 (26.5)                           | 28 (16.1)                                            |
| 26-30                                         | 278 (50.2) | 91 (47.6)                                        | 89 (47.1)                           | 98 (56.3)                                            |
| >30                                           | 135 (24.4) | 37 (19.4)                                        | 50 (26.5)                           | 48 (27.6)                                            |
| <b>Active birth duration (minutes)</b>        |            |                                                  |                                     |                                                      |
| <220                                          | 140 (25.3) | 69 (36.1)                                        | 46 (24.3)                           | 25 (14.4)                                            |
| 221-340                                       | 141 (25.5) | 45 (23.6)                                        | 53 (28.0)                           | 43 (24.7)                                            |
| 341-570                                       | 143 (25.8) | 50 (26.2)                                        | 49 (25.9)                           | 44 (25.3)                                            |
| >570                                          | 130 (23.5) | 27 (14.1)                                        | 41 (21.7)                           | 62 (35.6)                                            |
| <b>Second stage duration (minutes)</b>        |            |                                                  |                                     |                                                      |
| <16                                           | 109 (19.7) | 40 (20.9)                                        | 47 (24.9)                           | 22 (12.6)                                            |
| 16-30                                         | 187 (33.8) | 80 (41.9)                                        | 60 (31.8)                           | 47 (27.0)                                            |
| 31-45                                         | 89 (16.1)  | 31 (16.2)                                        | 27 (14.3)                           | 31 (17.8)                                            |
| >45                                           | 169 (30.5) | 40 (20.9)                                        | 55 (29.1)                           | 74 (42.5)                                            |
| <b>Birthweight (grams)</b>                    |            |                                                  |                                     |                                                      |
| <2999                                         | 76 (13.7)  | 39 (20.4)                                        | 23 (12.2)                           | 14 (8.1)                                             |
| 3000-3499                                     | 193 (34.8) | 69 (36.1)                                        | 81 (42.9)                           | 43 (24.7)                                            |
| 3500-3999                                     | 210 (37.9) | 64 (33.5)                                        | 65 (34.4)                           | 81 (46.6)                                            |
| ≥4000                                         | 75 (13.5)  | 19 (10.0)                                        | 20 (10.6)                           | 36 (20.7)                                            |
| <b>Head circumference (cm)**</b>              |            |                                                  |                                     |                                                      |
| <34                                           | 141 (25.5) | 58 (30.5)                                        | 52 (27.7)                           | 31 (17.8)                                            |
| 34                                            | 119 (21.6) | 45 (23.7)                                        | 37 (19.7)                           | 37 (21.3)                                            |
| 35                                            | 131 (23.7) | 35 (18.4)                                        | 53 (28.2)                           | 43 (24.7)                                            |
| >35                                           | 161 (29.2) | 52 (27.4)                                        | 46 (24.5)                           | 63 (36.2)                                            |
| <b>Pre-pregnancy dyspareunia (yes)</b>        | 107 (19.3) | 26 (13.6)                                        | 39 (20.6)                           | 42 (24.1)                                            |
| <b>Operative delivery (yes)</b>               | 95 (17.2)  | 6 (3.1)                                          | 29 (15.3)                           | 60 (34.5)                                            |
| <b>Episiotomi (yes)</b>                       | 54 (9.8)   | -                                                | 32 (16.9)                           | 22 (12.6)                                            |
| <b>Smoker, at inclusion (yes)*</b>            | 21 (3.8)   | 8 (4.2)                                          | 8 (4.2)                             | 5 (2.9)                                              |
| <b>Diabetes mellitus (yes)</b>                | 19 (3.4)   | 5 (2.6)                                          | 7 (3.7)                             | 7 (4.0)                                              |

\*One missing values, n=553

\*\*Two missing values, n=552

Moreover, a higher degree of rupture was seen with higher birthweight, longer second stage of labour and longer duration of active birth. Instrumental delivery was more frequent among women with second-degree (15%) and third- or fourth-degree ruptures (34%) compared to women with no/labia/first-degree ruptures (3%).

1  
2  
3  
4  
5  
6  
7  
8  
9  
10  
11  
12  
13  
14  
15  
16  
17  
18  
19  
20  
21  
22  
23  
24  
25  
26  
27  
28  
29  
30  
31  
32  
33  
34  
35  
36  
37  
38  
39  
40  
41  
42  
43  
44  
45  
46  
47  
48  
49  
50  
51  
52  
53  
54  
55  
56  
57  
58  
59  
60

#### 198 **Risk of sexual dysfunction and dyspareunia**

199 The proportion of pre-pregnancy dyspareunia was: 14%, 21%, and 24% in the no/labia/first-degree,  
200 second-degree and third- or fourth-degree rupture groups, respectively (Table 1). At 12 months  
201 postpartum, the proportion in all three groups was higher than pre-pregnancy; 25%, 38% and 53%  
202 respectively.

203 The risks for dyspareunia at 12 months postpartum are presented in Table 2.

For peer review only

Table 2: Relative Risks for dyspareunia 12 months postpartum among primiparous women in Denmark (n=554).

|                                                           | Total<br>n=554<br>n | Dyspareunia            |                       | Crude |               | Adjusted* |               |
|-----------------------------------------------------------|---------------------|------------------------|-----------------------|-------|---------------|-----------|---------------|
|                                                           |                     | Yes<br>n= 211<br>n (%) | No<br>n= 343<br>n (%) | RR    | (95% CI)      | RR        | (95% CI)      |
| <b>Degree of rupture</b>                                  |                     |                        |                       |       |               |           |               |
| No/labia/1 <sup>st</sup>                                  | 191                 | 47 (24.6)              | 144 (75.4)            | 1.00  | reference     | 1.00      | reference     |
| 2 <sup>nd</sup> (spontaneous)                             | 157                 | 59 (37.8)              | 97 (62.2)             | 1.53  | (1.11 - 2.10) | 2.05      | (1.51 - 2.78) |
| 2 <sup>nd</sup> (mediolateral episiotomy)                 | 32                  | 13 (40.6)              | 19 (59.4)             | 1.65  | (1.01 - 2.69) | 1.62      | (0.99 - 2.67) |
| 3 <sup>rd</sup> or 4 <sup>th</sup>                        | 174                 | 92 (52.9)              | 82 (47.1)             | 2.15  | (1.62 - 2.86) | 2.09      | (1.55 - 2.81) |
| <b>BMI, pre-pregnancy (kg/m<sup>2</sup>)**, mean (SD)</b> |                     |                        |                       |       | -             |           | -             |
| <25                                                       | 357                 | 140 (39.2)             | 217 (60.8)            | 1.00  | reference     | 1.00      | reference     |
| 25-29.9                                                   | 126                 | 50 (39.7)              | 76 (60.3)             | 1.01  | (0.79 - 1.30) | 1.05      | (0.82 - 1.36) |
| >29.9                                                     | 70                  | 21 (30.0)              | 49 (70.0)             | 0.77  | (0.52 - 1.12) | 0.82      | (0.56 - 1.19) |
| <b>Age at inclusion (years), mean (SD)</b>                |                     |                        |                       |       |               |           |               |
| ≤25                                                       | 141                 | 52 (36.9)              | 89 (63.1)             | 0.94  | (0.72 - 1.22) | 0.94      | (0.72 - 1.22) |
| 26-30                                                     | 278                 | 109 (39.2)             | 169 (60.8)            | 1.00  | reference     | 1.00      | reference     |
| >30                                                       | 135                 | 50 (37.0)              | 85 (63.0)             | 0.94  | (0.73 - 1.23) | 0.91      | (0.70 - 1.19) |
| <b>Active birth duration (minutes), mean (SD)</b>         |                     |                        |                       |       |               |           |               |
| <220                                                      | 140                 | 49 (35.0)              | 91 (65.0)             | 0.97  | (0.71 - 1.33) | 0.90      | (0.66 - 1.24) |
| 221-340                                                   | 141                 | 51 (36.2)              | 90 (63.8)             | 1.00  | reference     | 1.00      | reference     |
| 341-570                                                   | 143                 | 52 (36.4)              | 91 (63.6)             | 1.00  | (0.74 - 1.37) | 1.00      | (0.74 - 1.37) |
| >570                                                      | 130                 | 59 (45.4)              | 71 (54.6)             | 1.26  | (0.94 - 1.68) | 1.26      | (0.92 - 1.70) |
| <b>2nd stage duration (minutes), mean (SD)</b>            |                     |                        |                       |       |               |           |               |
| <16                                                       | 109                 | 34 (31.2)              | 75 (68.8)             | 0.82  | (0.59 - 1.15) | 0.80      | (0.57 - 1.12) |
| 16-30                                                     | 187                 | 71 (38.0)              | 116 (62.0)            | 1.00  | reference     | 1.00      | reference     |
| 31-45                                                     | 89                  | 29 (32.6)              | 60 (67.4)             | 0.86  | (0.60 - 1.22) | 0.86      | (0.61 - 1.23) |
| >45                                                       | 169                 | 77 (45.6)              | 92 (54.4)             | 1.20  | (0.94 - 1.54) | 1.15      | (0.88 - 1.52) |
| <b>Birthweight (grams), mean (SD)</b>                     |                     |                        |                       |       |               |           |               |
| <2999                                                     | 76                  | 31 (40.8)              | 45 (59.2)             | 1.05  | (0.76 - 1.45) | 1.09      | (0.79 - 1.51) |
| 3000-3499                                                 | 193                 | 75 (38.9)              | 118 (61.1)            | 1.00  | reference     | 1.00      | reference     |
| 3500-3999                                                 | 210                 | 82 (39.1)              | 128 (60.9)            | 1.01  | (0.79 - 1.28) | 0.96      | (0.75 - 1.22) |
| ≥4000                                                     | 75                  | 23 (30.7)              | 52 (69.3)             | 0.79  | (0.54 - 1.16) | 0.74      | (0.50 - 1.10) |

|                                        |     |           |           |                    |                    |
|----------------------------------------|-----|-----------|-----------|--------------------|--------------------|
| <b>Pre-pregnancy dyspareunia (yes)</b> | 107 | 66 (31.3) | 41 (12.0) | 1.90 (1.56 - 2.32) | 1.79 (1.45 - 2.21) |
| <b>Operative delivery (yes)</b>        | 65  | 45 (47.4) | 50 (52.6) | 1.31 (1.03 - 1.67) | 1.18 (0.90 - 1.54) |
| <b>Smoker at inclusion (yes)**</b>     | 21  | 10 (47.6) | 11 (52.4) | 1.27 (0.80 - 2.01) | 1.31 (0.82 - 2.10) |
| <b>Diabetes (yes)</b>                  | 19  | 7 (36.8)  | 12 (63.2) | 0.97 (0.53 - 1.76) | 1.02 (0.56 - 1.88) |

RR; relative risk ratio, CI; confidence interval, SD; standard deviation, BMI; body mass index

\*\* Adjusted for; age, BMI , birthweight, 2nd stage duration, active birth duration, smoking, diabetes, operative delivery, pre-pregnancy dyspareunia (2nd stage duration and active birth duration are not mutually adjusted for each other).

\*\*One missing value (n=553).

For peer review only

1  
2  
3  
4  
5  
6  
7  
8  
9  
10  
11  
12  
13  
14  
15  
16  
17  
18  
19  
20  
21  
22  
23  
24  
25  
26  
27  
28  
29  
30  
31  
32  
33  
34  
35  
36  
37  
38  
39  
40  
41  
42  
43  
44  
45  
46  
47  
48  
49  
50  
51  
52  
53  
54  
55  
56  
57  
58  
59  
60

206 Compared to women with no/labia/first-degree ruptures, women with third- or fourth-degree  
207 ruptures had higher risk of dyspareunia (aRR 2.09; 1.55-2.81), as did women with spontaneous  
208 second-degree ruptures (aRR 2.05; 1.51-2.78). Further, we found pre-pregnancy dyspareunia to be  
209 associated with postpartum dyspareunia (aRR 1.79; 1.45-2.21).

210 The mean PISQ-12 score was higher among women with third- or fourth-degree ruptures (12.2)  
211 than among women with no/labia-/first-degree ruptures (10.4) (Table 3).

For peer review only

Table 3: Risk for sexual dysfunction 12 months postpartum among primiparous women in Denmark (n=541).

|                                                   | Total<br>n=541 |            | PISQ-12 score* |                | Adjusted**         |                |
|---------------------------------------------------|----------------|------------|----------------|----------------|--------------------|----------------|
|                                                   | n              | mean (SD)  | Crude<br>coef. | (95% CI)       | coef.<br>mean (SD) | (95% CI)       |
| <b>Degree of rupture</b>                          |                |            |                |                |                    |                |
| No/labia/1 <sup>st</sup>                          | 188            | 10.4 (4.2) | 0              | reference      | 0                  | reference      |
| 2 <sup>nd</sup> (spontaneous)                     | 153            | 10.7 (5.1) | 0.37           | (-0.65 - 1.38) | 0.21               | (-0.81 - 1.22) |
| 2 <sup>nd</sup> (mediolateral episiotomy)         | 31             | 11.2 (4.2) | 0.81           | (-0.95 - 2.56) | 0.67               | (-1.13 - 2.46) |
| 3rd or 4th                                        | 169            | 12.1 (5.0) | 1.80           | (0.81 - 2.78)  | 1.69               | (0.61 - 2.76)  |
| <b>BMI (kg/m<sup>2</sup>)***, mean (SD)</b>       |                |            |                |                |                    |                |
| <25                                               | 349            | 11.2 (4.7) | 0              | reference      | 0                  | reference      |
| 25-29.9                                           | 121            | 10.8 (4.8) | -0.44          | (-1.43 - 0.56) | -0.23              | (-1.22 - 0.76) |
| >29.9                                             | 70             | 10.6 (5.4) | -0.60          | (-1.83 - 0.64) | -0.51              | (-1.74 - 0.72) |
| <b>Age (years), mean (SD)</b>                     |                |            |                |                |                    |                |
| ≤25                                               | 137            | 11.2 (5.1) | 0.45           | (-0.53 - 1.44) | 0.49               | (-0.49 - 1.47) |
| 26-30                                             | 270            | 10.8 (4.7) | 0              | reference      | 0                  | reference      |
| >30                                               | 134            | 11.5 (4.6) | 0.67           | (-0.32 - 1.67) | 0.61               | (-0.37 - 1.59) |
| <b>Active birth duration (minutes), mean (SD)</b> |                |            |                |                |                    |                |
| <220                                              | 137            | 10.9 (4.5) | -0.22          | (-1.35 - 0.91) | -0.24              | (-1.27 - 0.79) |
| 221-340                                           | 139            | 11.1 (5.5) | 0              | reference      | 0                  | reference      |
| 341-570                                           | 140            | 10.7 (4.4) | -0.46          | (-1.58 - 0.67) | -0.55              | (-1.57 - 0.47) |
| >570                                              | 125            | 11.6 (4.7) | 0.51           | (-0.65 - 1.67) | 0.09               | (-1.01 - 1.19) |
| <b>Second stage duration (minutes), mean (SD)</b> |                |            |                |                |                    |                |
| <16                                               | 109            | 10.9 (5.0) | -0.22          | (-1.36 - 0.92) | -0.30              | (-1.44 - 0.84) |
| 16-30                                             | 181            | 11.1 (4.9) | 0              | reference      | 0                  | reference      |
| 31-45                                             | 87             | 10.5 (4.4) | -0.60          | (-1.83 - 0.62) | -0.76              | (-1.98 - 0.46) |
| >45                                               | 164            | 11.5 (4.8) | 0.37           | (-0.64 - 1.39) | 0.05               | (-1.00 - 1.11) |
| <b>Birthweight (grams), mean (SD)</b>             |                |            |                |                |                    |                |
| <2999                                             | 75             | 12.3 (4.9) | 1.13           | (-0.14 - 2.41) | 0.99               | (-0.27 - 2.27) |
| 3000-3499                                         | 191            | 11.2 (4.6) | 0              | reference      | 0                  | reference      |
| 3500-3999                                         | 205            | 10.5 (4.8) | -0.66          | (-1.60 - 0.28) | -0.73              | (-1.68 - 0.21) |
| ≥4000                                             | 70             | 11.2 (5.1) | 0.08           | (-1.23 - 1.38) | 0.20               | (-1.10 - 1.51) |



1  
2  
3  
4  
5  
6  
7  
8  
9  
10  
11  
12  
13  
14  
15  
16  
17  
18  
19  
20  
21  
22  
23  
24  
25  
26  
27  
28  
29  
30  
31  
32  
33  
34  
35  
36  
37  
38  
39  
40  
41  
42  
43  
44  
45  
46

|                                        |     |            |      |                |       |                |
|----------------------------------------|-----|------------|------|----------------|-------|----------------|
| <b>Pre-pregnancy dyspareunia (yes)</b> | 104 | 13.0 (4.6) | 2.44 | (1.43 - 3.44)  | 2.45  | (1.44 - 3.46)  |
| <b>Operative delivery (yes)</b>        | 92  | 11.7 (4.7) | 0.69 | (-0.38 - 1.76) | 0.46  | (-0.72 - 1.63) |
| <b>Smoker at inclusion (yes)***</b>    | 21  | 13.8 (4.9) | 2.78 | (0.70 - 4.86)  | 2.99  | (0.93 - 5.06)  |
| <b>Diabetes (yes)</b>                  | 19  | 11.1 (4.9) | 0.00 | (-2.19 - 2.20) | -0.09 | (-2.27 - 2.09) |

RR; relative risk ratio, CI; confidence interval, SD; standard deviation

\*PISQ-12 score; Pelvic Organ Prolapse/Urinary Incontinence Sexual Function Questionnaire, range 0-48, higher score indicating higher degree of dysfunction, n=13 not included in analyses because of > 2 missing answers in the questionnaire

\*\* Adjusted for; age, BMI, birthweight, duration of the second stage of labour, duration of active birth, pre-pregnancy dyspareunia, smoking, diabetes, operative delivery (2nd stage duration and active birth duration are not mutually adjusted for each other)

\*\*\*One missing value (n=540).

For peer review only

1  
2  
3  
4  
5  
6  
7  
8  
9  
10  
11  
12  
13  
14  
15  
16  
17  
18  
19  
20  
21  
22  
23  
24  
25  
26  
27  
28  
29  
30  
31  
32  
33  
34  
35  
36  
37  
38  
39  
40  
41  
42  
43  
44  
45  
46  
47  
48  
49  
50  
51  
52  
53  
54  
55  
56  
57  
58  
59  
60

215 After adjustment, women with anal sphincter ruptures had 1.69 points higher score (95% CI 0.61-  
216 2.76) compared to women with no/labia/first-degree ruptures. Women reporting pre-pregnancy  
217 dyspareunia had an average 2.45 point higher score (95% CI 1.44-3.46) compared to women  
218 without pre-pregnancy dyspareunia. Further, we found smoking women to have a higher PISQ-12  
219 score compared to non-smoking women ( $\alpha\beta$  2.99; 0.93-5.06).  
220 The relative risks for dyspareunia postpartum according to perineal body length and perineal  
221 strength are presented in Table 4.

222

Table 4: Risk for dyspareunia according to perineal body length and perineal strength 12 months postpartum among primiparous women in Denmark (n=481).

|                                                              | Total<br>n=481<br>n | Dyspareunia            |                       | Crude<br>RR<br>(95% CI) | Adjusted*<br>RR<br>(95% CI) |
|--------------------------------------------------------------|---------------------|------------------------|-----------------------|-------------------------|-----------------------------|
|                                                              |                     | Yes<br>n= 182<br>n (%) | No<br>n= 285<br>n (%) |                         |                             |
| <b>Perineal body length</b>                                  |                     |                        |                       |                         |                             |
| > 2 cm                                                       | 468                 | 182 (38.9)             | 286 (61.1)            | 1.00 reference          | 1.00 reference              |
| ≤ 2 cm                                                       | 13                  | 8 (61.5)               | 5 (38.5)              | 1.58 (1.02 - 2.47)      | 1.72 (1.10 - 2.71)          |
| <b>Perineal strength,**</b>                                  | 467                 |                        |                       |                         |                             |
| <b>Change in the risk for every 10 mm Hg higher pressure</b> | <i>mean (SD)</i>    | <i>mean (SD)</i>       | <i>mean (SD)</i>      |                         |                             |
| Resting pressure (mm Hg)                                     | 77.7 (22.0)         | 75.5 (22.4)            | 79.1 (21.7)           | 0.96 (0.91 - 1.01)      | 0.96 (0.91 - 1.01)          |
| Maximum squeeze pressure(mm Hg)                              | 156.3 (49.4)        | 150.1 (50.0)           | 160.5 (49.0)          | 0.97 (0.95 - 0.99)      | 0.97 (0.95 - 0.99)          |

RR; relative risk ratio, CI; confidence interval, SD; standard deviation

\* Adjusted for; age, BMI, birthweight, 2nd stage duration, active birth duration, smoking, diabetes, operative delivery, pre-pregnancy dyspareunia, degree of rupture

\*\*14 missing values (n=467).

For peer review only

1  
2  
3  
4  
5  
6  
7  
8  
9  
10  
11  
12  
13  
14  
15  
16  
17  
18  
19  
20  
21  
22  
23  
24  
25  
26  
27  
28  
29  
30  
31  
32  
33  
34  
35  
36  
37  
38  
39  
40  
41  
42  
43  
44  
45  
46  
47  
48  
49  
50  
51  
52  
53  
54  
55  
56  
57  
58  
59  
60

224

We found women with a perineal body length  $\leq 2$  cm to be in higher risk of dyspareunia compared to women with a perineal body length  $> 2$ cm (aRR 1.72; 1.10-2.71). A lower maximal perineal pressure in women with dyspareunia compared to women without dyspareunia (150 vs 161 mm Hg) was observed. For every 10 mm Hg higher maximum pressure, the risk of dyspareunia decreased with 3% (aRR 0.97; 0.95-0.99).

## DISCUSSION

### Main Findings

At 12 months postpartum, more than half of the women who sustained anal sphincter ruptures had dyspareunia compared to one fourth in women with no/labia/first-degree ruptures. Women with anal sphincter ruptures had a higher degree of sexual dysfunction in general. In addition, we found women with perineal body length  $\leq 2$  cm and reduced perineal strength to be in higher risk of dyspareunia.

### Interpretation (in light of other evidence)

The literature on sexual dysfunction measured more than six months postpartum is in general sparse which makes it difficult to compare our results to those from other studies. Our study showed that primiparous women, regardless degree of rupture, experienced high levels of sexual dysfunction postpartum in accordance with the findings from another large cohort study.<sup>3</sup> In line with other studies,<sup>3 5 19</sup> we found more women with second-degree ruptures to have dyspareunia compared to women with no or minor ruptures. The same studies found pre-pregnancy dyspareunia to be associated with postpartum dyspareunia<sup>3 5 19</sup>. We observed the same association, but the association between degree of perineal rupture and postpartum dyspareunia, did not seem to be affected by the presence of dyspareunia before pregnancy.

1  
2  
3  
4  
5  
6  
7  
8  
9  
10  
11  
12  
13  
14  
15  
16  
17  
18  
19  
20  
21  
22  
23  
24  
25  
26  
27  
28  
29  
30  
31  
32  
33  
34  
35  
36  
37  
38  
39  
40  
41  
42  
43  
44  
45  
46  
47  
48  
49  
50  
51  
52  
53  
54  
55  
56  
57  
58  
59  
60

247 Our study showed smoking women to have a higher PISQ-12 score than the non-smoking women.

248 Studies addressing the association between smoking and female sexual health are few and results  
249 are inconsistent.<sup>20-23</sup> However, smoking has an anti-oestrogenic effect,<sup>24</sup> and low oestrogen levels  
250 are related to higher prevalence of sexual dysfunction among women.<sup>25</sup>

251 There is limited knowledge on dyspareunia postpartum and the role of the pelvic floor muscles<sup>26</sup>.  
252 To our knowledge, only one study including 177 women has investigated the relation between  
253 perineal strength and dyspareunia and found no association.<sup>26</sup> We found both perineal length and  
254 strength to be associated with the risk of dyspareunia. Thus more women with a short perineum and  
255 reduced perineal strength had dyspareunia.

### 256 **Strengths and limitations**

257 The study had a high follow-up rate for both the web-based questionnaire and clinical examination.  
258 A major strength of this study is the inclusion of only primiparous women. Hereby, we were able to  
259 assess the possible association between the degree of rupture and the risk of sexual dysfunction  
260 without the influence of previous deliveries and ruptures. Further, the inclusion of a control group  
261 without perineal muscle ruptures made it possible to assess the effect of a vaginal delivery itself  
262 without ruptures to the perineal muscles. In addition, all women had a clinical examination two  
263 weeks postpartum and thereby the risk of misclassification according to exposure group was  
264 minimized.

265 A limitation of the present study is the fact that all clinical examinations were performed by the  
266 same examiner (DG). To limit differential misclassification, the examiner was blinded of the sexual  
267 function status of each participant and aimed to stay blinded to the degree of rupture the women in  
268 question had sustained.

269 In the present study, we used the standardized and validated PISQ-12 questionnaire. However, the  
270 PISQ-12 questionnaire is developed and validated in populations of heterogeneous couples. The

1  
2  
3  
4 271 questions addressing partner erection and premature ejaculation are only relevant for women with a  
5  
6 272 male partner. As the total PISQ-12 score depended on at least 10 answered questions, some women  
7  
8  
9 273 were excluded from these analyses based on their partner relationship. Thus, some of our results  
10  
11 274 may only be relevant for heterosexual couples.

12  
13 275 Other studies have found an association between sexual dysfunction and breastfeeding, as  
14  
15  
16 276 breastfeeding might fulfil parts of a woman's need for proximity and lead to decreased oestrogen  
17  
18 277 levels causing vaginal dryness.<sup>27-29</sup> We did not have information on breastfeeding. However, we  
19  
20 278 have no reason to believe that breastfeeding should be unevenly distributed across degrees of  
21  
22  
23 279 perineal ruptures.

24  
25 280 The study had a risk of recall bias as we asked the women to recall pre-pregnancy information.  
26  
27 281 Ideally, sexual function should have been established before pregnancy. However this would  
28  
29  
30 282 require another study design.

### 31 32 283 **Clinical implications**

33  
34 284 Although sexual problems are common one year after childbirth, especially among women  
35  
36 285 sustaining ruptures of second-, third- or fourth-degree the proportion of women who ask for help or  
37  
38  
39 286 discuss their problems is low.<sup>5 30</sup> Thus, it is important to give words to the sexual well-being in the  
40  
41 287 postpartum assessment of women and to put a particular focus on the women in high risk of  
42  
43 288 developing sexual dysfunction. If dyspareunia seem to be caused by vaginal dryness, local vaginal  
44  
45  
46 289 oestrogen or lubricants should be provided. If tender scar tissue is identified, perineal massage or  
47  
48 290 use of lignocaine gel may be help-full,<sup>31</sup> and thus new mothers should be given these advises.

### 49 50 291 **Conclusion**

51  
52 292 The findings from this cohort study of primiparous women demonstrate that impairment of sexual  
53  
54  
55 293 health is common among primiparous women after vaginal delivery. Women delivering with no  
56  
57 294 ruptures, ruptures isolated to the labia or small ruptures of first-degree reported the best outcomes  
58  
59  
60

1  
2  
3  
4  
5  
6  
7  
8  
9  
10  
11  
12  
13  
14  
15  
16  
17  
18  
19  
20  
21  
22  
23  
24  
25  
26  
27  
28  
29  
30  
31  
32  
33  
34  
35  
36  
37  
38  
39  
40  
41  
42  
43  
44  
45  
46  
47  
48  
49  
50  
51  
52  
53  
54  
55  
56  
57  
58  
59  
60

overall, while more than half of the women with anal sphincter ruptures were experiencing dyspareunia. It is therefore important to minimize the extent of perineal trauma and to thoroughly counsel women and their partners about sexuality during and after pregnancy.

#### **Disclosure of interests**

Nothing to declare

#### **Contribution to Authorship**

All authors contributed to the design of this study. DG performed the data collection and conducted the analyses and DG, VR, EAN and NQ contributed to the interpretation of data. DG drafted the manuscript and all authors critically revised the manuscript and approved the version to be published.

#### **Data sharing**

Extra data is available by emailing the corresponding author.

#### **Details of ethics approval**

The study was approved by the Scientific Ethics Committee for the Region of Southern Denmark (S-20120213, 14.5.2013) and by the Danish Data Protection Agency (ID-2008-58-0035, 14.1.2015).

All participants provided written informed consent.

**Funding:** The study was funded by Odense University Hospitals Research Foundation, The Region of Southern Denmark, University of Southern Denmark, the Department of Gynaecology and Obstetrics, Odense University Hospital, The A.P. Moeller Foundation for the Advancement of Medical Science (grant no.13-93), and The Danish Association of Midwives. The funding sources had no influence or involvement in the study.

## References

1. Bossini L, Fortini V, Casolaro I, et al. [Sexual dysfunctions, psychiatric diseases and quality of life: a review]. *Psychiatria polska* 2014;48(4):715-26. [published Online First: 2014/10/16]
2. Lagaert L, Weyers S, Van Kerrebroeck H, et al. Postpartum dyspareunia and sexual functioning: a prospective cohort study. *The European journal of contraception & reproductive health care : the official journal of the European Society of Contraception* 2017;22(3):200-06. doi: 10.1080/13625187.2017.1315938 [published Online First: 2017/04/28]
3. Signorello LB, Harlow BL, Chekos AK, et al. Postpartum sexual functioning and its relationship to perineal trauma: a retrospective cohort study of primiparous women. *American journal of obstetrics and gynecology* 2001;184(5):881-8; discussion 88-90. doi: 10.1067/mob.2001.113855 [published Online First: 2001/04/17]
4. Buhling KJ, Schmidt S, Robinson JN, et al. Rate of dyspareunia after delivery in primiparae according to mode of delivery. *European journal of obstetrics, gynecology, and reproductive biology* 2006;124(1):42-6. doi: 10.1016/j.ejogrb.2005.04.008 [published Online First: 2005/07/19]
5. Barrett G, Pendry E, Peacock J, et al. Women's sexual health after childbirth. *BJOG : an international journal of obstetrics and gynaecology* 2000;107(2):186-95. [published Online First: 2000/02/25]
6. Connolly A, Thorp J, Pahel L. Effects of pregnancy and childbirth on postpartum sexual function: a longitudinal prospective study. *International urogynecology journal and pelvic floor dysfunction* 2005;16(4):263-7. doi: 10.1007/s00192-005-1293-6 [published Online First: 2005/04/20]
7. Serati M, Salvatore S, Siesto G, et al. Female sexual function during pregnancy and after childbirth. *The journal of sexual medicine* 2010;7(8):2782-90. doi: 10.1111/j.1743-6109.2010.01893.x [published Online First: 2010/07/16]
8. Radestad I, Olsson A, Nissen E, et al. Tears in the vagina, perineum, sphincter ani, and rectum and first sexual intercourse after childbirth: a nationwide follow-up. *Birth (Berkeley, Calif)* 2008;35(2):98-106. doi: 10.1111/j.1523-536X.2008.00222.x [published Online First: 2008/05/30]
9. McDonald EA, Gartland D, Small R, et al. Dyspareunia and childbirth: a prospective cohort study. *BJOG : an international journal of obstetrics and gynaecology* 2015;122(5):672-9. doi: 10.1111/1471-0528.13263 [published Online First: 2015/01/22]
10. Leeman L, Rogers R, Borders N, et al. The Effect of Perineal Lacerations on Pelvic Floor Function and Anatomy at 6 Months Postpartum in a Prospective Cohort of Nulliparous Women. *Birth (Berkeley, Calif)* 2016;43(4):293-302. doi: 10.1111/birt.12258 [published Online First: 2016/11/01]
11. Gommesen D, Nohr EA, Drue HC, et al. Obstetric perineal tears: risk factors, wound infection and dehiscence: a prospective cohort study. *Archives of gynecology and obstetrics* 2019 doi: 10.1007/s00404-019-05165-1 [published Online First: 2019/04/21]
12. Harris PA, Taylor R, Thielke R, et al. Research electronic data capture (REDCap)--a metadata-driven methodology and workflow process for providing translational research informatics support. *Journal of biomedical informatics* 2009;42(2):377-81. doi: 10.1016/j.jbi.2008.08.010 [published Online First: 2008/10/22]
13. Rogers RG, Coates KW, Kammerer-Doak D, et al. A short form of the Pelvic Organ Prolapse/Urinary Incontinence Sexual Questionnaire (PISQ-12). *International urogynecology journal and pelvic floor dysfunction* 2003;14(3):164-8; discussion 68. doi: 10.1007/s00192-003-1063-2 [published Online First: 2003/09/05]
14. Ducarme G, Hamel JF, Brun S, et al. Sexual function and postpartum depression 6 months after attempted operative vaginal delivery according to fetal head station: A prospective population-based cohort study. *PloS one* 2017;12(6):e0178915. doi: 10.1371/journal.pone.0178915 [published Online First: 2017/06/08]



1  
2  
3  
4  
5  
6  
7  
8  
9  
10  
11  
12  
13  
14  
15  
16  
17  
18  
19  
20  
21  
22  
23  
24  
25  
26  
27  
28  
29  
30  
31  
32  
33  
34  
35  
36  
37  
38  
39  
40  
41  
42  
43  
44  
45  
46  
47  
48  
49  
50  
51  
52  
53  
54  
55  
56  
57  
58  
59  
60

15. Brubaker L, Handa VL, Bradley CS, et al. Sexual function 6 months after first delivery. *Obstetrics and gynecology* 2008;111(5):1040-4. doi: 10.1097/AOG.0b013e318169cdee [published Online First: 2008/05/02]
16. Fernando RJS, A.H; Freeman, R.M; Williams, A.A; Adams, E.J;. The Management of Third- and Fourth-Degree Perineal Tears. RCOG Green-top Guideline No 29. London: Royal College of Obstetricians and Gynaecologists, 2015.
17. Bump RC, Mattiasson A, Bo K, et al. The standardization of terminology of female pelvic organ prolapse and pelvic floor dysfunction. *American journal of obstetrics and gynecology* 1996;175(1):10-7. [published Online First: 1996/07/01]
18. Textor J, Hardt J, Knuppel S. DAGitty: a graphical tool for analyzing causal diagrams. *Epidemiology (Cambridge, Mass)* 2011;22(5):745. doi: 10.1097/EDE.0b013e318225c2be [published Online First: 2011/08/04]
19. O'Malley D, Higgins A, Begley C, et al. Prevalence of and risk factors associated with sexual health issues in primiparous women at 6 and 12 months postpartum; a longitudinal prospective cohort study (the MAMMI study). *BMC pregnancy and childbirth* 2018;18(1):196. doi: 10.1186/s12884-018-1838-6 [published Online First: 2018/06/02]
20. Choi J, Shin DW, Lee S, et al. Dose-response relationship between cigarette smoking and female sexual dysfunction. *Obstetrics & gynecology science* 2015;58(4):302-8. doi: 10.5468/ogs.2015.58.4.302 [published Online First: 2015/07/29]
21. Cayan S, Akbay E, Bozlu M, et al. The prevalence of female sexual dysfunction and potential risk factors that may impair sexual function in Turkish women. *Urologia internationalis* 2004;72(1):52-7. doi: 10.1159/000075273 [published Online First: 2004/01/20]
22. Oksuz E, Malhan S. Prevalence and risk factors for female sexual dysfunction in Turkish women. *The Journal of urology* 2006;175(2):654-8; discussion 58. doi: 10.1016/s0022-5347(05)00149-7 [published Online First: 2006/01/13]
23. Sidi H, Puteh SE, Abdullah N, et al. The prevalence of sexual dysfunction and potential risk factors that may impair sexual function in Malaysian women. *The journal of sexual medicine* 2007;4(2):311-21. doi: 10.1111/j.1743-6109.2006.00319.x [published Online First: 2006/10/17]
24. Tziomalos K, Charsoulis F. Endocrine effects of tobacco smoking. *Clinical endocrinology* 2004;61(6):664-74. doi: 10.1111/j.1365-2265.2004.02161.x [published Online First: 2004/12/08]
25. Dennerstein L, Randolph J, Taffe J, et al. Hormones, mood, sexuality, and the menopausal transition. *Fertility and sterility* 2002;77 Suppl 4:S42-8. [published Online First: 2002/05/15]
26. Tennfjord MK, Hilde G, Staer-Jensen J, et al. Dyspareunia and pelvic floor muscle function before and during pregnancy and after childbirth. *International urogynecology journal* 2014;25(9):1227-35. doi: 10.1007/s00192-014-2373-2 [published Online First: 2014/04/02]
27. LaMarre AK, Paterson LQ, Gorzalka BB. Breastfeeding and postpartum maternal sexual functioning: a review. *The Canadian Journal of Human Sexuality* 2003;12:151+.
28. Matthies LM, Wallwiener M, Sohn C, et al. The influence of partnership quality and breastfeeding on postpartum female sexual function. *Arch Gynecol Obstet* 2019;299(1):69-77. doi: 10.1007/s00404-018-4925-z [published Online First: 2018/10/18]
29. Byrd JE, Hyde JS, DeLamater JD, et al. Sexuality during pregnancy and the year postpartum. *J Fam Pract* 1998;47(4):305-8. [published Online First: 1998/10/28]
30. Glazener CM. Sexual function after childbirth: women's experiences, persistent morbidity and lack of professional recognition. *British journal of obstetrics and gynaecology* 1997;104(3):330-5. [published Online First: 1997/03/01]
31. Sultan A, Thakar R, Fenner D. Perineal and Anal Sphincter Trauma. London, UK: Springer 2007.

STROBE Statement—Checklist of items that should be included in reports of *cohort studies*

|                              | Item No | Recommendation                                                                                                                                                                                                                                                                                                         | Page No      |
|------------------------------|---------|------------------------------------------------------------------------------------------------------------------------------------------------------------------------------------------------------------------------------------------------------------------------------------------------------------------------|--------------|
| <b>Title and abstract</b>    | 1       | (a) Indicate the study's design with a commonly used term in the title or the abstract<br>(b) Provide in the abstract an informative and balanced summary of what was done and what was found                                                                                                                          | 1<br>2-3     |
| <b>Introduction</b>          |         |                                                                                                                                                                                                                                                                                                                        |              |
| Background/rationale         | 2       | Explain the scientific background and rationale for the investigation being reported                                                                                                                                                                                                                                   | 4            |
| Objectives                   | 3       | State specific objectives, including any prespecified hypotheses                                                                                                                                                                                                                                                       | 4            |
| <b>Methods</b>               |         |                                                                                                                                                                                                                                                                                                                        |              |
| Study design                 | 4       | Present key elements of study design early in the paper                                                                                                                                                                                                                                                                | 4            |
| Setting                      | 5       | Describe the setting, locations, and relevant dates, including periods of recruitment, exposure, follow-up, and data collection                                                                                                                                                                                        | 4-5          |
| Participants                 | 6       | (a) Give the eligibility criteria, and the sources and methods of selection of participants. Describe methods of follow-up<br>(b) For matched studies, give matching criteria and number of exposed and unexposed                                                                                                      | 5-6<br>N/A   |
| Variables                    | 7       | Clearly define all outcomes, exposures, predictors, potential confounders, and effect modifiers. Give diagnostic criteria, if applicable                                                                                                                                                                               | 6-7          |
| Data sources/<br>measurement | 8*      | For each variable of interest, give sources of data and details of methods of assessment (measurement). Describe comparability of assessment methods if there is more than one group                                                                                                                                   | 6-7          |
| Bias                         | 9       | Describe any efforts to address potential sources of bias                                                                                                                                                                                                                                                              | 7-8          |
| Study size                   | 10      | Explain how the study size was arrived at                                                                                                                                                                                                                                                                              | 4            |
| Quantitative variables       | 11      | Explain how quantitative variables were handled in the analyses. If applicable, describe which groupings were chosen and why                                                                                                                                                                                           | 5-7          |
| Statistical methods          | 12      | (a) Describe all statistical methods, including those used to control for confounding<br>(b) Describe any methods used to examine subgroups and interactions<br>(c) Explain how missing data were addressed<br>(d) If applicable, explain how loss to follow-up was addressed<br>(e) Describe any sensitivity analyses | 7-8          |
| <b>Results</b>               |         |                                                                                                                                                                                                                                                                                                                        |              |
| Participants                 | 13*     | (a) Report numbers of individuals at each stage of study—eg numbers potentially eligible, examined for eligibility, confirmed eligible, included in the study, completing follow-up, and analysed<br>(b) Give reasons for non-participation at each stage<br>(c) Consider use of a flow diagram                        | 8            |
| Descriptive data             | 14*     | (a) Give characteristics of study participants (eg demographic, clinical, social) and information on exposures and potential confounders<br>(b) Indicate number of participants with missing data for each variable of interest<br>(c) Summarise follow-up time (eg, average and total amount)                         | Table 1, p.9 |
| Outcome data                 | 15*     | Report numbers of outcome events or summary measures over time                                                                                                                                                                                                                                                         | 10-15        |

|    |                          |    |                                                                                                                                                                                                              |       |
|----|--------------------------|----|--------------------------------------------------------------------------------------------------------------------------------------------------------------------------------------------------------------|-------|
| 1  | Main results             | 16 | (a) Give unadjusted estimates and, if applicable, confounder-adjusted estimates and their precision (eg, 95% confidence interval). Make clear which confounders were adjusted for and why they were included | 10-15 |
| 2  |                          |    | (b) Report category boundaries when continuous variables were categorized                                                                                                                                    |       |
| 3  |                          |    | (c) If relevant, consider translating estimates of relative risk into absolute risk for a meaningful time period                                                                                             |       |
| 4  |                          |    |                                                                                                                                                                                                              |       |
| 5  | Other analyses           | 17 | Report other analyses done—eg analyses of subgroups and interactions, and sensitivity analyses                                                                                                               |       |
| 6  | <b>Discussion</b>        |    |                                                                                                                                                                                                              |       |
| 7  | Key results              | 18 | Summarise key results with reference to study objectives                                                                                                                                                     | 18    |
| 8  | Limitations              | 19 | Discuss limitations of the study, taking into account sources of potential bias or imprecision. Discuss both direction and magnitude of any potential bias                                                   | 19-20 |
| 9  | Interpretation           | 20 | Give a cautious overall interpretation of results considering objectives, limitations, multiplicity of analyses, results from similar studies, and other relevant evidence                                   | 18-21 |
| 10 | Generalisability         | 21 | Discuss the generalisability (external validity) of the study results                                                                                                                                        | 19-20 |
| 11 | <b>Other information</b> |    |                                                                                                                                                                                                              |       |
| 12 | Funding                  | 22 | Give the source of funding and the role of the funders for the present study and, if applicable, for the original study on which the present article is based                                                | 21    |

\*Give information separately for exposed and unexposed groups.

**Note:** An Explanation and Elaboration article discusses each checklist item and gives methodological background and published examples of transparent reporting. The STROBE checklist is best used in conjunction with this article (freely available on the Web sites of PLoS Medicine at <http://www.plosmedicine.org/>, Annals of Internal Medicine at <http://www.annals.org/>, and Epidemiology at <http://www.epidem.com/>). Information on the STROBE Initiative is available at <http://www.strobe-statement.org>.

# BMJ Open

## Obstetric perineal tears, sexual function and dyspareunia among primiparous women 12 months postpartum: a prospective cohort study

|                                 |                                                                                                                                                                                                                                                                                                                                                                                                                                                                                                                                                                                |
|---------------------------------|--------------------------------------------------------------------------------------------------------------------------------------------------------------------------------------------------------------------------------------------------------------------------------------------------------------------------------------------------------------------------------------------------------------------------------------------------------------------------------------------------------------------------------------------------------------------------------|
| Journal:                        | <i>BMJ Open</i>                                                                                                                                                                                                                                                                                                                                                                                                                                                                                                                                                                |
| Manuscript ID                   | bmjopen-2019-032368.R1                                                                                                                                                                                                                                                                                                                                                                                                                                                                                                                                                         |
| Article Type:                   | Research                                                                                                                                                                                                                                                                                                                                                                                                                                                                                                                                                                       |
| Date Submitted by the Author:   | 29-Aug-2019                                                                                                                                                                                                                                                                                                                                                                                                                                                                                                                                                                    |
| Complete List of Authors:       | Gommesen, Ditte; University of Southern Denmark, Institute of Clinical Research; Odense University Hospital, Gynaecology and Obstetrics<br>Nøhr, Ellen; University of Southern Denmark, Institute of Clinical Research; Odense University Hospital, Gynaecology and Obstetrics<br>Qvist, Niels; University of Southern Denmark, Institute of Clinical Research; Odense University Hospital, Department of Gastroenterological Surgery<br>Rasch, Vibeke; Odense University Hospital, Gynaecology and Obstetrics; University of Southern Denmark, Institute of Clinical Research |
| <b>Primary Subject Heading</b>: | Sexual health                                                                                                                                                                                                                                                                                                                                                                                                                                                                                                                                                                  |
| Secondary Subject Heading:      | Obstetrics and gynaecology, Epidemiology                                                                                                                                                                                                                                                                                                                                                                                                                                                                                                                                       |
| Keywords:                       | EPIDEMIOLOGY, Urogynaecology < GYNAECOLOGY, Maternal medicine < OBSTETRICS, SEXUAL MEDICINE                                                                                                                                                                                                                                                                                                                                                                                                                                                                                    |
|                                 |                                                                                                                                                                                                                                                                                                                                                                                                                                                                                                                                                                                |

SCHOLARONE™  
Manuscripts

1  
2  
3  
4  
5  
6  
7  
8  
9  
10  
11  
12  
13  
14  
15  
16  
17  
18  
19  
20  
21  
22  
23  
24  
25  
26  
27  
28  
29  
30  
31  
32  
33  
34  
35  
36  
37  
38  
39  
40  
41  
42  
43  
44  
45  
46  
47  
48  
49  
50  
51  
52  
53  
54  
55  
56  
57  
58  
59  
60

1 **Full Title:** Obstetric perineal tears, sexual function and dyspareunia among primiparous women 12

2 months postpartum: a prospective cohort study

3

4 Ditte Gommesen, MHSc, Midwife and PhD student

5 Institute of Clinical Research, University of Southern Denmark

6 OPEN, Odense Patient data Explorative Network, Odense University Hospital

7 Department of Gynaecology and Obstetrics, Odense University Hospital

8 J.B. Winsløvs Vej 4, 5000 Odense C, Denmark

9

10 Ellen Aagaard Nohr, Professor and Consultant Midwife

11 Institute of Clinical Research, University of Southern Denmark

12 Department of Gynaecology and Obstetrics, Odense University Hospital

13 J.B. Winsløvs Vej 4, 5000 Odense C, Denmark

14

15 Niels Qvist, Professor and Senior Consultant

16 Institute of Clinical Research, University of Southern Denmark

17 Department of Gastroenterological Surgery, Odense University Hospital,

18 J.B. Winsløvs Vej 4, 5000 Odense C, Denmark

19

20 Vibeke Rasch, Professor and Senior Consultant

21 Institute of Clinical Research, University of Southern Denmark

22 Department of Gynaecology and Obstetrics, Odense University Hospital

23 J.B. Winsløvs Vej 4, 5000 Odense C, Denmark

24

1  
2  
3  
4 25 **Funding:** The study was funded by Odense University Hospitals Research Foundation, The Region  
5  
6 26 of Southern Denmark, University of Southern Denmark, the Department of Gynaecology and  
7  
8 27 Obstetrics, Odense University Hospital, The A.P. Moeller Foundation for the Advancement of  
9  
10 28 Medical Science (grant no.13-93), and **The Danish Association of Midwives**. The funding sources  
11  
12  
13 29 had no influence or involvement in the study.  
14  
15  
16 30

17  
18 31 **Correspondence:** Ditte Gommesen, Department of Gynaecology and Obstetrics, Odense  
19  
20 32 University Hospital, J.B. Winsløvs Vej 4, 5000 Odense C, Denmark.

21  
22  
23 33 Phone number: 0045 29419788

24  
25 34 Email [ditte.gommesen@rsyd.dk](mailto:ditte.gommesen@rsyd.dk)  
26  
27 35

28  
29 36 **Short running title:** Obstetric perineal tears, sexual function and dyspareunia.

30  
31 37 **Word count:** 2498 words  
32  
33  
34 38  
35  
36 39  
37  
38  
39  
40  
41  
42  
43  
44  
45  
46  
47  
48  
49  
50  
51  
52  
53  
54  
55  
56  
57  
58  
59  
60

## 40 ABSTRACT

41 **Objective:** Sexuality is an important aspect of human identity and contributes significantly to the  
42 quality of life in women as well as in men. Impairment in sexual health after vaginal delivery is a  
43 major concern for many women. We aimed to examine the association between degree of perineal  
44 tear and sexual function 12 months postpartum.

45 **Design:** A prospective cohort study

46 **Setting:** Four Danish hospitals between July 2015 and January 2019

47 **Participants:** A total of 554 primiparous women: 191 with no/labia/first-degree tears, 189 with  
48 second-degree tears, and 174 with third-/fourth-degree tears. Baseline data were obtained 2 weeks  
49 postpartum by a questionnaire and a clinical examination. Sexual function was evaluated 12 months  
50 postpartum by an electronic questionnaire (PISQ-12) and a clinical examination.

51 **Primary outcome measures:** Total PISQ-12 score and dyspareunia.

52 **Results:** Episiotomy was performed in 54 cases and 95 women had an operative vaginal delivery.  
53 The proportion of women with dyspareunia was: 25%, 38% and 53% of women with no/labia/first-  
54 degree, second-degree or third-/fourth-degree tears, respectively.

55 Compared to women with no/labia/first-degree tears, women with second degree or third- or fourth-  
56 degree tears had higher risk of dyspareunia (aRR 2.05; 95% CI 1.51-2.78 and aRR 2.09; 95% CI  
57 1.55-2.81, respectively). Women with third- or fourth-degree tears had a higher mean PISQ-12  
58 score (12.2) than women with no/labia/first-degree tears (10.4)

59 **Conclusions:** Impairment of sexual health is common among primiparous women after vaginal  
60 delivery. At 12 months postpartum more than half of the women with an third- or fourth-degree tear  
61 experienced dyspareunia. Women delivering with no/labia/first-degree tears reported the best  
62 outcomes overall. Thus, it is important to minimize the extent of perineal trauma and to counsel  
63 about sexuality during and after pregnancy.

1  
2  
3  
4 64

5  
6 65 **Article summary**

7  
8  
9  
10 66 Strengths and limitations of this study:

- 11  
12  
13 67 • The study had a high follow-up rate for both the web-based questionnaire and clinical  
14 68 examination.  
15 69  
16 70 • The study included both subjective and objective outcome measurements.  
17  
18  
19 71  
20 72 • All the clinical examinations were performed by the same examiner raising a possible risk of  
21 73 intra observer bias.  
22 74  
23 75  
24 76 • There was a risk of recall bias as information about pre-pregnancy sexual function was  
25 77 obtained postpartum.  
26 77  
27  
28 78



## 79 INTRODUCTION

80 Sexuality is an important aspect of human identity and contributes significantly to the quality of life  
81 in women as well as in men.<sup>1</sup> Sexual function postpartum is affected by the changes in hormonal  
82 milieu, anatomy, and family structure following childbirth. Dyspareunia and other sexual problems  
83 such as loss of sex drive in the postpartum period is a well-known problem and frequencies of  
84 sexual health problems as high as 30-60% three months postpartum and 17-31% six months  
85 postpartum have been reported.<sup>2-7</sup> A large cohort study from Sweden found vaginal or perineal  
86 tears, regardless of degree, to be associated with a delay in women's resumption of sexual  
87 intercourse defined as more than 3 months after giving birth,<sup>8</sup> while about 10% of primiparous  
88 women had not yet resumed sexual intercourse six months postpartum.<sup>3</sup> The causes of sexual health  
89 problems are multifactorial and the mechanisms are still not fully understood.<sup>3-5 9</sup> Thus sexual  
90 health problems remains an unsolved problem for many women. Among other things, anatomical  
91 changes caused by vaginal or perineal tears may contribute to dyspareunia and has important effects  
92 on both the timing and quality of the resumption of sexual relations during the initial postpartum  
93 months.<sup>10</sup> The association between obstetrical risk factors and postpartum sexual function is not yet  
94 well described or understood and thus the aim of this study was to investigate the association  
95 between degree of perineal tear, sexual function and dyspareunia 12 months postpartum.

## 96 METHODS

### 97 Study setting

98 This study is part of a larger prospective cohort study conducted at two university and two tertiary  
99 hospital units in Denmark, Odense (OUH), Aarhus (AUH), Esbjerg, and Kolding, between July  
100 2015 and January 2019. The inclusion procedure and sample size calculation is described  
101 thoroughly elsewhere.<sup>11</sup>

### 102 Study population

1  
2  
3  
4 103 The study involved three groups of women i) 203 women with no/labia/first-degree perineal tears,  
5  
6 104 ii) 200 women with second-degree perineal tears and iii) 200 women with third-/fourth-degree  
7  
8  
9 105 perineal tears.

### 11 106 **Patient and Public Involvement**

12  
13 107 There was no patient or public involvement in design and conduct of this study.

### 16 108 **Inclusion and follow-up procedure**

17  
18 109 Women delivering vaginally, at least 18 years old, able to read and speak Danish were eligible.

19  
20 110 After the delivery, they were informed about the study. Further information was sent by e-mail and

21  
22 111 the women were invited by phone to participate in a face-to-face interview including baseline

23  
24 112 questionnaires and a clinical examination comprising a perineal inspection at 16±5 days

25  
26 113 postpartum. Written informed consent was obtained at baseline.<sup>11</sup> At 12 months postpartum, all

27  
28 114 participants received the same questionnaires electronically and were invited to a gynaecological

29  
30 115 examination. All examinations took place at the hospital and participants could bring their baby.

31  
32 116 Study data were collected and managed using REDCap electronic data capture tools hosted at

33  
34 117 OUH.<sup>12</sup>

### 39 118 **Outcome measurements**

40  
41 119 The primary outcome was sexual function. We used the Danish version of the Pelvic Organ

42  
43 120 Prolapse/Urinary Incontinence Sexual Function Questionnaire (PISQ-12).<sup>13</sup> The PISQ-12 is a self-

44  
45 121 administered, objective and validated questionnaire with scores based on 12 questions to evaluate

46  
47 122 sexual function. The score of each item ranges from 0=never to 4=always (reverse scoring for

48  
49 123 questions 1, 2, 3 and 4). Missing responses are handled by multiplying the mean of answered items

50  
51 124 and the score is valid with up to 2 missing answers.<sup>13</sup> The questionnaire has previously been used to

52  
53 125 evaluate sexual function after vaginal delivery.<sup>14 15</sup> We used the total score (range 0-48) with lower

54  
55 126 scores indicating better sexual function, and the individual score for question 5; "Do you feel pain

56  
57  
58  
59  
60

1  
2  
3  
4 127 during sexual intercourse?”. The total score was used as a continuous variable presented as mean  
5  
6  
7 128 and standard deviation (SD) and the single score for question 5 was dichotomized as dyspareunia  
8  
9 129 when answering “sometimes”, “usually” or “always” and no dyspareunia when answering “seldom”  
10  
11 130 or “never”.

### 13 131 **Exposure variables and covariates**

#### 16 132 **Degrees of perineal tears**

18 133 The degree of perineal tear was defined according to the Green-top Guideline No. 29.<sup>16</sup> First-degree  
19  
20 134 tears were defined as injury to perineal skin and/or vaginal mucosa. Second-degree tears were  
21  
22  
23 135 defined as injury to perineum involving perineal muscles but not the anal sphincter. Third- and  
24  
25 136 fourth-degree tears were defined as injury to perineum involving the anal sphincter complex.  
26  
27 137 Episiotomies were lateral or mediolateral. Episiotomies equivalent to a second-degree tear were  
28  
29  
30 138 analysed independently while episiotomies extending to the anal sphincter muscles were classified  
31  
32 139 as a third- or fourth-degree tear.

#### 34 140 **Baseline information**

36 141 At baseline 16±5 days postpartum, a questionnaire was completed providing information about age  
37  
38  
39 142 (years), height (centimetres), smoking status (yes/no), and pregestational BMI (kg/m<sup>2</sup>). Information  
40  
41 143 about pregnancy, birth and the postpartum period was obtained from the obstetric journal and  
42  
43 144 included diabetes mellitus (yes/no), length of active birth and length of the second stage of labour  
44  
45  
46 145 (minutes), operative delivery (yes/no), birthweight (gram) and head circumference (centimetres).  
47  
48 146 The PISQ-12 was likewise completed at baseline providing information about pre-pregnancy sexual  
49  
50 147 function. Question 5 was used and dichotomized as the postpartum score described previously.

#### 52 148 **Clinical examination 12 months postpartum**

54  
55 149 Perineal length was evaluated by a gynaecological examination. All procedures were done by the  
56  
57 150 first author (DG), with the women in the dorsal lithotomy position without bowel preparation. At  
58  
59  
60

1  
2  
3  
4 151 the gynaecological examination, perineal body length was measured in centimetres, from the  
5  
6  
7 152 hymen to the middle of anus during Valsalva manoeuvre as done in the Pelvic Organ  
8  
9 153 Quantification (POP-Q) system,<sup>17</sup> and used as a dichotomous variable ( $\leq 2$  cm/ $> 2$  cm).  
10

## 11 154 **Statistical analyses**

12  
13 155 Baseline characteristics according to degree of tear were described as frequencies for categorical  
14  
15  
16 156 variables. To investigate the association between the degree of perineal tear and dyspareunia or  
17  
18 157 perineal body length, a relative risk regression by use of a generalized linear model with log-link  
19  
20 158 function and binomial distribution as statistical family was performed with estimates reported as  
21  
22  
23 159 relative risks (RR) with 95% confidence intervals (CI). To investigate the association between the  
24  
25 160 degree of perineal tear and sexual health problems measured as the total PISQ-12 score, a linear  
26  
27 161 regression was performed, and results presented as regression coefficients ( $\beta$ ) with 95% CI. In the  
28  
29  
30 162 adjusted analysis, we controlled for pre-pregnancy dyspareunia, smoking, diabetes and operative  
31  
32 163 delivery as categorical variables and age, BMI, duration of the second stage of labour, duration of  
33  
34 164 active birth and birthweight as continuous variables. These potential confounders were chosen a  
35  
36 165 priori based on directed acyclic graphs generated for the outcome variable using DAGitty v2.3 as  
37  
38  
39 166 graphical tool for analyzing the causal diagrams.<sup>18</sup> The analyses were carried out using STATA  
40  
41 167 statistical software version 15.0.  
42

## 43 168 **RESULTS**

### 44 169 **Participants**

45  
46  
47  
48 170 Initially, a total of 832 women were invited to participate in the study (Figure 1). Of these, 81  
49  
50 171 declined and 138 could not be reached. This left 613 women completing a written consent and a  
51  
52  
53 172 baseline questionnaire who were booked for a clinical examination  $16 \pm 5$  days postpartum. Ten  
54  
55 173 women withdrew their consent. Thus, the study population comprised 603 women. At the one year  
56  
57 174 follow-up, 554 of the 603 women answered the web-based questionnaire corresponding to 92%, and  
58  
59  
60

1  
2  
3  
4  
5  
6  
7  
8  
9  
10  
11  
12  
13  
14  
15  
16  
17  
18  
19  
20  
21  
22  
23  
24  
25  
26  
27  
28  
29  
30  
31  
32  
33  
34  
35  
36  
37  
38  
39  
40  
41  
42  
43  
44  
45  
46  
47  
48  
49  
50  
51  
52  
53  
54  
55  
56  
57  
58  
59  
60

175 481 women had the clinical examination performed corresponding to 80%. Due to more than two  
176 missing answers, 13 women were excluded from analyses of total PISQ-12 score.

177 **Characteristics according to degree of tear**

178 Women sustaining third- or fourth-degree tears were on average 0.5 years older than women  
179 sustaining second-degree tears and 1.2 years older than women sustaining no/labia/first-degree tears  
180 (Table 1).

For peer review only

Table 1: Characteristics according to degree of tear among primiparous women (n=554).

|                                               | Total      | Group 1<br>(No/labia/<br>1 <sup>st</sup> degree) | Group 2<br>(2 <sup>nd</sup> degree) | Group 3<br>(3 <sup>rd</sup> /4 <sup>th</sup> degree) |
|-----------------------------------------------|------------|--------------------------------------------------|-------------------------------------|------------------------------------------------------|
|                                               | (n=554)    | (n=191)                                          | (n=189)                             | (n=174)                                              |
|                                               | n (%)      | n (%)                                            | n (%)                               | n (%)                                                |
| <b>BMI, pre-pregnancy (kg/m<sup>2</sup>)*</b> |            |                                                  |                                     |                                                      |
| <25                                           | 357 (64.6) | 128 (67.0)                                       | 116 (61.7)                          | 113 (64.9)                                           |
| 25-29.9                                       | 126 (22.8) | 41 (21.5)                                        | 46 (24.5)                           | 39 (22.4)                                            |
| ≥29.9                                         | 70 (12.7)  | 22 (11.5)                                        | 26 (13.8)                           | 22 (12.6)                                            |
| <b>Age at inclusion (years)</b>               |            |                                                  |                                     |                                                      |
| ≤25                                           | 141 (25.5) | 63 (33.0)                                        | 50 (26.5)                           | 28 (16.1)                                            |
| 26-30                                         | 278 (50.2) | 91 (47.6)                                        | 89 (47.1)                           | 98 (56.3)                                            |
| >30                                           | 135 (24.4) | 37 (19.4)                                        | 50 (26.5)                           | 48 (27.6)                                            |
| <b>Active birth duration (minutes)</b>        |            |                                                  |                                     |                                                      |
| <220                                          | 140 (25.3) | 69 (36.1)                                        | 46 (24.3)                           | 25 (14.4)                                            |
| 221-340                                       | 141 (25.5) | 45 (23.6)                                        | 53 (28.0)                           | 43 (24.7)                                            |
| 341-570                                       | 143 (25.8) | 50 (26.2)                                        | 49 (25.9)                           | 44 (25.3)                                            |
| >570                                          | 130 (23.5) | 27 (14.1)                                        | 41 (21.7)                           | 62 (35.6)                                            |
| <b>Second stage duration (minutes)</b>        |            |                                                  |                                     |                                                      |
| <16                                           | 109 (19.7) | 40 (20.9)                                        | 47 (24.9)                           | 22 (12.6)                                            |
| 16-30                                         | 187 (33.8) | 80 (41.9)                                        | 60 (31.8)                           | 47 (27.0)                                            |
| 31-45                                         | 89 (16.1)  | 31 (16.2)                                        | 27 (14.3)                           | 31 (17.8)                                            |
| >45                                           | 169 (30.5) | 40 (20.9)                                        | 55 (29.1)                           | 74 (42.5)                                            |
| <b>Birthweight (grams)</b>                    |            |                                                  |                                     |                                                      |
| <2999                                         | 76 (13.7)  | 39 (20.4)                                        | 23 (12.2)                           | 14 (8.1)                                             |
| 3000-3499                                     | 193 (34.8) | 69 (36.1)                                        | 81 (42.9)                           | 43 (24.7)                                            |
| 3500-3999                                     | 210 (37.9) | 64 (33.5)                                        | 65 (34.4)                           | 81 (46.6)                                            |
| ≥4000                                         | 75 (13.5)  | 19 (10.0)                                        | 20 (10.6)                           | 36 (20.7)                                            |
| <b>Head circumference (cm)**</b>              |            |                                                  |                                     |                                                      |
| <34                                           | 141 (25.5) | 58 (30.5)                                        | 52 (27.7)                           | 31 (17.8)                                            |
| 34                                            | 119 (21.6) | 45 (23.7)                                        | 37 (19.7)                           | 37 (21.3)                                            |
| 35                                            | 131 (23.7) | 35 (18.4)                                        | 53 (28.2)                           | 43 (24.7)                                            |
| >35                                           | 161 (29.2) | 52 (27.4)                                        | 46 (24.5)                           | 63 (36.2)                                            |
| <b>Pre-pregnancy dyspareunia (yes)</b>        | 107 (19.3) | 26 (13.6)                                        | 39 (20.6)                           | 42 (24.1)                                            |
| <b>Operative delivery (yes)</b>               | 95 (17.2)  | 6 (3.1)                                          | 29 (15.3)                           | 60 (34.5)                                            |
| <b>Episiotomi (yes)</b>                       | 54 (9.8)   | -                                                | 32 (16.9)                           | 22 (12.6)                                            |
| <b>Smoker, at inclusion (yes)*</b>            | 21 (3.8)   | 8 (4.2)                                          | 8 (4.2)                             | 5 (2.9)                                              |
| <b>Diabetes mellitus (yes)</b>                | 19 (3.4)   | 5 (2.6)                                          | 7 (3.7)                             | 7 (4.0)                                              |

\*One missing values, n=553

\*\*Two missing values, n=552

Moreover, a higher degree of tear was seen with higher birthweight, longer second stage of labour and longer duration of active birth. Instrumental delivery was more frequent among women with second-degree (15%) and third- or fourth-degree tears (34%) compared to women with no/labia/first-degree tears (3%).

1  
2  
3  
4  
5  
6  
7  
8  
9  
10  
11  
12  
13  
14  
15  
16  
17  
18  
19  
20  
21  
22  
23  
24  
25  
26  
27  
28  
29  
30  
31  
32  
33  
34  
35  
36  
37  
38  
39  
40  
41  
42  
43  
44  
45  
46  
47  
48  
49  
50  
51  
52  
53  
54  
55  
56  
57  
58  
59  
60

187 **Risk of sexual health problems and dyspareunia**

188 The proportion of pre-pregnancy dyspareunia was: 14%, 21%, and 24% in the no/labia/first-degree,  
189 second-degree and third- or fourth-degree tear groups, respectively (Table 1). At 12 months  
190 postpartum, the proportion in all three groups was higher than pre-pregnancy; 25%, 38% and 53%  
191 respectively.

192 The risks for dyspareunia at 12 months postpartum are presented in Table 2.

For peer review only

Table 2: Relative Risks for dyspareunia 12 months postpartum among primiparous women in Denmark (n=554).

|                                                            | Total<br>n=554<br>n | Dyspareunia            |                       | Crude |               | Adjusted* |               |
|------------------------------------------------------------|---------------------|------------------------|-----------------------|-------|---------------|-----------|---------------|
|                                                            |                     | Yes<br>n= 211<br>n (%) | No<br>n= 343<br>n (%) | RR    | (95% CI)      | RR        | (95% CI)      |
| <b>Degree of tear</b>                                      |                     |                        |                       |       |               |           |               |
| No/labia/1 <sup>st</sup>                                   | 191                 | 47 (24.6)              | 144 (75.4)            | 1.00  | reference     | 1.00      | reference     |
| 2 <sup>nd</sup> (spontaneous)                              | 157                 | 59 (37.8)              | 97 (62.2)             | 1.53  | (1.11 - 2.10) | 2.05      | (1.51 - 2.78) |
| 2 <sup>nd</sup> (mediolateral episiotomy)                  | 32                  | 13 (40.6)              | 19 (59.4)             | 1.65  | (1.01 - 2.69) | 1.62      | (0.99 - 2.67) |
| 3 <sup>rd</sup> or 4 <sup>th</sup>                         | 174                 | 92 (52.9)              | 82 (47.1)             | 2.15  | (1.62 - 2.86) | 2.09      | (1.55 - 2.81) |
| <b>BMI, pre-pregnancy (kg/m<sup>2</sup>)**</b> , mean (SD) |                     |                        |                       |       | -             |           | -             |
| <25                                                        | 357                 | 140 (39.2)             | 217 (60.8)            | 1.00  | reference     | 1.00      | reference     |
| 25-29.9                                                    | 126                 | 50 (39.7)              | 76 (60.3)             | 1.01  | (0.79 - 1.30) | 1.05      | (0.82 - 1.36) |
| >29.9                                                      | 70                  | 21 (30.0)              | 49 (70.0)             | 0.77  | (0.52 - 1.12) | 0.82      | (0.56 - 1.19) |
| <b>Age at inclusion (years)</b> , mean (SD)                |                     |                        |                       |       |               |           |               |
| ≤25                                                        | 141                 | 52 (36.9)              | 89 (63.1)             | 0.94  | (0.72 - 1.22) | 0.94      | (0.72 - 1.22) |
| 26-30                                                      | 278                 | 109 (39.2)             | 169 (60.8)            | 1.00  | reference     | 1.00      | reference     |
| >30                                                        | 135                 | 50 (37.0)              | 85 (63.0)             | 0.94  | (0.73 - 1.23) | 0.91      | (0.70 - 1.19) |
| <b>Active birth duration (minutes)</b> , mean (SD)         |                     |                        |                       |       |               |           |               |
| <220                                                       | 140                 | 49 (35.0)              | 91 (65.0)             | 0.97  | (0.71 - 1.33) | 0.90      | (0.66 - 1.24) |
| 221-340                                                    | 141                 | 51 (36.2)              | 90 (63.8)             | 1.00  | reference     | 1.00      | reference     |
| 341-570                                                    | 143                 | 52 (36.4)              | 91 (63.6)             | 1.00  | (0.74 - 1.37) | 1.00      | (0.74 - 1.37) |
| >570                                                       | 130                 | 59 (45.4)              | 71 (54.6)             | 1.26  | (0.94 - 1.68) | 1.26      | (0.92 - 1.70) |
| <b>2nd stage duration (minutes)</b> , mean (SD)            |                     |                        |                       |       |               |           |               |
| <16                                                        | 109                 | 34 (31.2)              | 75 (68.8)             | 0.82  | (0.59 - 1.15) | 0.80      | (0.57 - 1.12) |
| 16-30                                                      | 187                 | 71 (38.0)              | 116 (62.0)            | 1.00  | reference     | 1.00      | reference     |
| 31-45                                                      | 89                  | 29 (32.6)              | 60 (67.4)             | 0.86  | (0.60 - 1.22) | 0.86      | (0.61 - 1.23) |
| >45                                                        | 169                 | 77 (45.6)              | 92 (54.4)             | 1.20  | (0.94 - 1.54) | 1.15      | (0.88 - 1.52) |
| <b>Birthweight (grams)</b> , mean (SD)                     |                     |                        |                       |       |               |           |               |
| <2999                                                      | 76                  | 31 (40.8)              | 45 (59.2)             | 1.05  | (0.76 - 1.45) | 1.09      | (0.79 - 1.51) |
| 3000-3499                                                  | 193                 | 75 (38.9)              | 118 (61.1)            | 1.00  | reference     | 1.00      | reference     |
| 3500-3999                                                  | 210                 | 82 (39.1)              | 128 (60.9)            | 1.01  | (0.79 - 1.28) | 0.96      | (0.75 - 1.22) |
| ≥4000                                                      | 75                  | 23 (30.7)              | 52 (69.3)             | 0.79  | (0.54 - 1.16) | 0.74      | (0.50 - 1.10) |



1  
2  
3  
4  
5  
6  
7  
8  
9  
10  
11  
12  
13  
14  
15  
16  
17  
18  
19  
20  
21  
22  
23  
24  
25  
26  
27  
28  
29  
30  
31  
32  
33  
34  
35  
36  
37  
38  
39  
40  
41  
42  
43  
44  
45  
46

|                                        |     |           |           |                    |                    |
|----------------------------------------|-----|-----------|-----------|--------------------|--------------------|
| <b>Pre-pregnancy dyspareunia (yes)</b> | 107 | 66 (31.3) | 41 (12.0) | 1.90 (1.56 - 2.32) | 1.79 (1.45 - 2.21) |
| <b>Operative delivery (yes)</b>        | 65  | 45 (47.4) | 50 (52.6) | 1.31 (1.03 - 1.67) | 1.18 (0.90 - 1.54) |
| <b>Smoker at inclusion (yes)**</b>     | 21  | 10 (47.6) | 11 (52.4) | 1.27 (0.80 - 2.01) | 1.31 (0.82 - 2.10) |
| <b>Diabetes (yes)</b>                  | 19  | 7 (36.8)  | 12 (63.2) | 0.97 (0.53 - 1.76) | 1.02 (0.56 - 1.88) |

RR; relative risk ratio, CI; confidence interval, SD; standard deviation, BMI; body mass index  
 \*\* Adjusted for; age, BMI , birthweight, 2nd stage duration, active birth duration, smoking, diabetes, operative delivery, pre-pregnancy dyspareunia  
 (2nd stage duration and active birth duration are not mutually adjusted for each other).  
 \*\*One missing value (n=553).

For peer review only

1  
2  
3  
4  
5  
6  
7  
8  
9  
10  
11  
12  
13  
14  
15  
16  
17  
18  
19  
20  
21  
22  
23  
24  
25  
26  
27  
28  
29  
30  
31  
32  
33  
34  
35  
36  
37  
38  
39  
40  
41  
42  
43  
44  
45  
46  
47  
48  
49  
50  
51  
52  
53  
54  
55  
56  
57  
58  
59  
60

195 Compared to women with no/labia/first-degree tears, women with third- or fourth-degree tears had  
196 higher risk of dyspareunia (aRR 2.09; 1.55-2.81), as did women with spontaneous second-degree  
197 tears (aRR 2.05; 1.51-2.78). Further, we found pre-pregnancy dyspareunia to be associated with  
198 postpartum dyspareunia (aRR 1.79; 1.45-2.21).

199 At 12 months postpartum the mean PISQ-12 score was higher among women with third- or fourth-  
200 degree tears (12.2) than among women with no/labia/first-degree tears (10.4) (Table 3).

For peer review only

Table 3: Risk for sexual health problems 12 months postpartum among primiparous women in Denmark (n=541).

|                                                   | Total<br>n=541 |            | PISQ-12 score* |                | Adjusted** |                |
|---------------------------------------------------|----------------|------------|----------------|----------------|------------|----------------|
|                                                   | n              | mean (SD)  | Crude<br>coef. | (95% CI)       | coef.      | (95% CI)       |
| <b>Degree of tear</b>                             |                |            |                |                |            |                |
| No/labia/1 <sup>st</sup>                          | 188            | 10.4 (4.2) | 0              | reference      | 0          | reference      |
| 2 <sup>nd</sup> (spontaneous)                     | 153            | 10.7 (5.1) | 0.37           | (-0.65 - 1.38) | 0.21       | (-0.81 - 1.22) |
| 2 <sup>nd</sup> (mediolateral episiotomy)         | 31             | 11.2 (4.2) | 0.81           | (-0.95 - 2.56) | 0.67       | (-1.13 - 2.46) |
| 3rd or 4th                                        | 169            | 12.1 (5.0) | 1.80           | (0.81 - 2.78)  | 1.69       | (0.61 - 2.76)  |
| <b>BMI (kg/m<sup>2</sup>)***, mean (SD)</b>       |                |            |                |                |            |                |
| <25                                               | 349            | 11.2 (4.7) | 0              | reference      | 0          | reference      |
| 25-29.9                                           | 121            | 10.8 (4.8) | -0.44          | (-1.43 - 0.56) | -0.23      | (-1.22 - 0.76) |
| >29.9                                             | 70             | 10.6 (5.4) | -0.60          | (-1.83 - 0.64) | -0.51      | (-1.74 - 0.72) |
| <b>Age (years), mean (SD)</b>                     |                |            |                |                |            |                |
| ≤25                                               | 137            | 11.2 (5.1) | 0.45           | (-0.53 - 1.44) | 0.49       | (-0.49 - 1.47) |
| 26-30                                             | 270            | 10.8 (4.7) | 0              | reference      | 0          | reference      |
| >30                                               | 134            | 11.5 (4.6) | 0.67           | (-0.32 - 1.67) | 0.61       | (-0.37 - 1.59) |
| <b>Active birth duration (minutes), mean (SD)</b> |                |            |                |                |            |                |
| <220                                              | 137            | 10.9 (4.5) | -0.22          | (-1.35 - 0.91) | -0.24      | (-1.27 - 0.79) |
| 221-340                                           | 139            | 11.1 (5.5) | 0              | reference      | 0          | reference      |
| 341-570                                           | 140            | 10.7 (4.4) | -0.46          | (-1.58 - 0.67) | -0.55      | (-1.57 - 0.47) |
| >570                                              | 125            | 11.6 (4.7) | 0.51           | (-0.65 - 1.67) | 0.09       | (-1.01 - 1.19) |
| <b>Second stage duration (minutes), mean (SD)</b> |                |            |                |                |            |                |
| <16                                               | 109            | 10.9 (5.0) | -0.22          | (-1.36 - 0.92) | -0.30      | (-1.44 - 0.84) |
| 16-30                                             | 181            | 11.1 (4.9) | 0              | reference      | 0          | reference      |
| 31-45                                             | 87             | 10.5 (4.4) | -0.60          | (-1.83 - 0.62) | -0.76      | (-1.98 - 0.46) |
| >45                                               | 164            | 11.5 (4.8) | 0.37           | (-0.64 - 1.39) | 0.05       | (-1.00 - 1.11) |
| <b>Birthweight (grams), mean (SD)</b>             |                |            |                |                |            |                |
| <2999                                             | 75             | 12.3 (4.9) | 1.13           | (-0.14 - 2.41) | 0.99       | (-0.27 - 2.27) |
| 3000-3499                                         | 191            | 11.2 (4.6) | 0              | reference      | 0          | reference      |
| 3500-3999                                         | 205            | 10.5 (4.8) | -0.66          | (-1.60 - 0.28) | -0.73      | (-1.68 - 0.21) |
| ≥4000                                             | 70             | 11.2 (5.1) | 0.08           | (-1.23 - 1.38) | 0.20       | (-1.10 - 1.51) |

|                                        |     |            |      |                |       |                |
|----------------------------------------|-----|------------|------|----------------|-------|----------------|
| <b>Pre-pregnancy dyspareunia (yes)</b> | 104 | 13.0 (4.6) | 2.44 | (1.43 - 3.44)  | 2.45  | (1.44 - 3.46)  |
| <b>Operative delivery (yes)</b>        | 92  | 11.7 (4.7) | 0.69 | (-0.38 - 1.76) | 0.46  | (-0.72 - 1.63) |
| <b>Smoker at inclusion (yes)***</b>    | 21  | 13.8 (4.9) | 2.78 | (0.70 - 4.86)  | 2.99  | (0.93 - 5.06)  |
| <b>Diabetes (yes)</b>                  | 19  | 11.1 (4.9) | 0.00 | (-2.19 - 2.20) | -0.09 | (-2.27 - 2.09) |

RR; relative risk ratio, CI; confidence interval, SD; standard deviation

\*PISQ-12 score; Pelvic Organ Prolapse/Urinary Incontinence Sexual Function Questionnaire, range 0-48, higher score indicating higher degree of sexual health problems, n=13 not included in analyses because of > 2 missing answers in the questionnaire

\*\* Adjusted for; age, BMI, birthweight, duration of the second stage of labour, duration of active birth, pre-pregnancy dyspareunia, smoking, diabetes, operative delivery (2nd stage duration and active birth duration are not mutually adjusted for each other)

\*\*\*One missing value (n=540).

For peer review only

1  
2  
3  
4  
5  
6  
7  
8  
9  
10  
11  
12  
13  
14  
15  
16  
17  
18  
19  
20  
21  
22  
23  
24  
25  
26  
27  
28  
29  
30  
31  
32  
33  
34  
35  
36  
37  
38  
39  
40  
41  
42  
43  
44  
45  
46  
47  
48  
49  
50  
51  
52  
53  
54  
55  
56  
57  
58  
59  
60

204 After adjustment, women with anal sphincter tears had 1.69 points higher score (95% CI 0.61-2.76)  
205 compared to women with no/labia/first-degree tears. Women reporting pre-pregnancy dyspareunia  
206 had an average 2.45 point higher score (95% CI 1.44-3.46) compared to women without pre-  
207 pregnancy dyspareunia. Further, we found smoking women to have a higher PISQ-12 score  
208 compared to non-smoking women ( $\beta$  2.99; 0.93-5.06).

209 The relative risks for dyspareunia postpartum according to perineal body length are presented in  
210 Table 4.

211

For peer review only

Table 4: Risk for dyspareunia according to perineal body length 12 months postpartum among primiparous women in Denmark (n=481).

|                             | Total<br>n=481<br>n | Dyspareunia            |                       | Crude<br>RR<br>(95% CI) | Adjusted*<br>RR<br>(95% CI) |
|-----------------------------|---------------------|------------------------|-----------------------|-------------------------|-----------------------------|
|                             |                     | Yes<br>n= 182<br>n (%) | No<br>n= 285<br>n (%) |                         |                             |
| <b>Perineal body length</b> |                     |                        |                       |                         |                             |
| > 2 cm                      | 468                 | 182 (38.9)             | 286 (61.1)            | 1.00 reference          | 1.00 reference              |
| ≤ 2 cm                      | 13                  | 8 (61.5)               | 5 (38.5)              | 1.58 (1.02 - 2.47)      | 1.72 (1.10 - 2.71)          |

RR; relative risk ratio, CI; confidence interval, SD; standard deviation

\* Adjusted for; age, BMI, birthweight, 2nd stage duration, active birth duration, smoking, diabetes, operative delivery, pre-pregnancy dyspareunia, degree of tear

1  
2  
3  
4  
5  
6  
7  
8  
9  
10  
11  
12  
13  
14  
15  
16  
17  
18  
19  
20  
21  
22  
23  
24  
25  
26  
27  
28  
29  
30  
31  
32  
33  
34  
35  
36  
37  
38  
39  
40  
41  
42  
43  
44  
45  
46  
47  
48  
49  
50  
51  
52  
53  
54  
55  
56  
57  
58  
59  
60

213

214 We found women with a perineal body length  $\leq 2$  cm to be in higher risk of dyspareunia compared  
215 to women with a perineal body length  $> 2$ cm (aRR 1.72; 1.10-2.71).

## 216 DISCUSSION

### 217 Main Findings

218 At 12 months postpartum, more than half of the women who sustained anal sphincter tears had  
219 dyspareunia compared to one fourth in women with no/labia/first-degree tears. Women with anal  
220 sphincter tears had a higher degree of sexual health problems in general. In addition, we found  
221 women with perineal body length  $\leq 2$  cm to be in higher risk of dyspareunia.

### 222 Interpretation (in light of other evidence)

223 The literature on sexual function measured more than six months postpartum is in general sparse  
224 which makes it difficult to compare our results to those from other studies. Our study showed that  
225 primiparous women, regardless degree of tear, experienced high levels of sexual health problems  
226 postpartum in accordance with the findings from another large cohort study.<sup>3</sup> In line with other  
227 studies,<sup>3 5 19</sup> we found more women with second-degree tears to have dyspareunia compared to  
228 women with no or minor tears. The same studies found pre-pregnancy dyspareunia to be associated  
229 with postpartum dyspareunia.<sup>3 5 19</sup> We observed the same association, but the association between  
230 degree of perineal tear and postpartum dyspareunia, did not seem to be affected by the presence of  
231 dyspareunia before pregnancy.

232 Our study showed smoking women to have a higher PISQ-12 score than the non-smoking women.  
233 Studies addressing the association between smoking and female sexual health are few and results  
234 are inconsistent.<sup>20-23</sup> However, smoking has an anti-oestrogenic effect,<sup>24</sup> and low oestrogen levels  
235 are related to higher prevalence of sexual health problems among women.<sup>25</sup>

1  
2  
3  
4  
5  
6  
7  
8  
9  
10  
11  
12  
13  
14  
15  
16  
17  
18  
19  
20  
21  
22  
23  
24  
25  
26  
27  
28  
29  
30  
31  
32  
33  
34  
35  
36  
37  
38  
39  
40  
41  
42  
43  
44  
45  
46  
47  
48  
49  
50  
51  
52  
53  
54  
55  
56  
57  
58  
59  
60

236 There is limited knowledge on dyspareunia postpartum and the role of the pelvic floor muscles<sup>26</sup>.

237 To our knowledge, only one study including 177 women has investigated the relation between the  
238 perineal muscles and dyspareunia and found no association.<sup>26</sup> We found perineal length to be  
239 associated with the risk of dyspareunia. Thus more women with a short perineum had dyspareunia.

### 240 **Strengths and limitations**

241 The study had a high follow-up rate for both the web-based questionnaire and clinical examination.

242 A major strength of this study is the inclusion of only primiparous women. Hereby, we were able to  
243 assess the possible association between the degree of tear and the risk of sexual health problems  
244 without the influence of previous deliveries and tears. Further, the inclusion of a control group  
245 without perineal muscle tears made it possible to assess the effect of a vaginal delivery itself  
246 without tears to the perineal muscles. In addition, all women had a clinical examination two weeks  
247 postpartum and thereby the risk of misclassification according to exposure group was minimized.

248 A limitation of the present study is the fact that all clinical examinations were performed by the  
249 same examiner (DG). To limit differential misclassification, the examiner was blinded of the sexual  
250 function status of each participant and aimed to stay blinded to the degree of tear the women in  
251 question had sustained.

252 In the present study, we used the standardized and validated PISQ-12 questionnaire. However, the  
253 PISQ-12 questionnaire is developed and validated in populations of heterogeneous couples. The  
254 questions addressing partner erection and premature ejaculation are only relevant for women with a  
255 male partner. As the total PISQ-12 score depended on at least 10 answered questions, some women  
256 were excluded from these analyses based on their partner relationship. Thus, some of our results  
257 may only be relevant for heterosexual couples. The PISQ-12 score has biophysical focus in general  
258 and lacks the relational and psychological issues that may have an impact on postpartum sexual



1  
2  
3  
4  
5  
6  
7  
8  
9  
10  
11  
12  
13  
14  
15  
16  
17  
18  
19  
20  
21  
22  
23  
24  
25  
26  
27  
28  
29  
30  
31  
32  
33  
34  
35  
36  
37  
38  
39  
40  
41  
42  
43  
44  
45  
46  
47  
48  
49  
50  
51  
52  
53  
54  
55  
56  
57  
58  
59  
60

259 health. Thus, this study does not address these issues, which are highly relevant in the context of  
260 sexual health in a vulnerable period of life.

261 Other studies have found an association between sexual health problems and breastfeeding, as  
262 breastfeeding might fulfil parts of a woman`s need for proximity and lead to decreased oestrogen  
263 levels causing vaginal dryness.<sup>27-29</sup> We did not have information on breastfeeding. Yet, we have no  
264 reason to believe that breastfeeding should be unevenly distributed across degrees of perineal tears.  
265 In accordance with the results from a large Irish cohort study, we did not find episiotomies to be  
266 associated with sexual health problems 12 months postpartum.<sup>19</sup> In our primary adjusted analyses,  
267 we included episiotomy to adjust for any potential confounding effect. Excluding episiotomy from  
268 the analyses only changed the adjusted estimates marginally and thus episiotomy did not seem to be  
269 a confounder in this study.

270 We found 19.3% to report pre-pregnancy dyspareunia. However, the study had a risk of recall bias  
271 as we asked the women to recall pre-pregnancy information 2 weeks postpartum, which might be  
272 influenced by the degree of perineal tear experienced. Ideally, sexual function should have been  
273 established before pregnancy but this would require another study design. Ideally, sexual function  
274 should have been established before pregnancy. However this would require another study design.

## 276 **Clinical implications**

277 Although sexual problems are common one year after childbirth, especially among women  
278 sustaining tears of second-, third- or fourth-degree the proportion of women who ask for help or  
279 discuss their problems is low.<sup>5 30</sup> Thus, it is important to give words to the sexual well-being in the  
280 postpartum assessment of women and to put a particular focus on the women in high risk of  
281 developing sexual health problems. Further, pregnancy is a time in women's life when they are in  
282 contact with the health services. This leaves an opportunity to identify and counsel women with  
283 dyspareunia as they are at risk of persistent sexual health problems 12 months postpartum.

284 Spontaneous second-degree tears seemed to increase the risk of dyspareunia. The same association  
285 was not found for mediolateral or lateral episiotomies. Thus, episiotomy might be considered to  
286 prevent dyspareunia in some cases. However, this needs to be investigated further in larger datasets  
287 with more episiotomies and perhaps also accounting for methods of repair which may vary across  
288 clinical settings.

289 If dyspareunia seem to be caused by vaginal dryness, local vaginal oestrogen or lubricants should be  
290 provided. If tender scar tissue is identified, perineal massage or use of lignocaine gel may be help-  
291 full,<sup>31</sup> and thus new mothers should be given these advises.

## 292 **Conclusion**

293 The findings from this cohort study of primiparous women demonstrate that impairment of sexual  
294 health is common among primiparous women after vaginal delivery. Women delivering with no  
295 tears, tears isolated to the labia or small tears of first-degree reported the best outcomes overall,  
296 while more than half of the women with anal sphincter tears were experiencing dyspareunia. It is  
297 therefore important to minimize the extent of perineal trauma and to thoroughly counsel women and  
298 their partners about sexuality before, during and after pregnancy.

## 299 **Disclosure of interests**

1  
2  
3  
4 300 Nothing to declare

6 301 **Contribution to Authorship**

8  
9 302 All authors contributed to the design of this study. DG performed the data collection and conducted  
10  
11 303 the analyses and DG, VR, EAN and NQ contributed to the interpretation of data. DG drafted the  
12  
13 304 manuscript and all authors critically revised the manuscript and approved the version to be  
14  
15  
16 305 published.

17  
18  
19 306 **Data sharing**

20  
21 307 Extra data is available by emailing the corresponding author.

22  
23 308 **Details of ethics approval**

24  
25  
26 309 The study was approved by the Scientific Ethics Committee for the Region of Southern Denmark  
27  
28 310 (S-20120213, 14.5.2013) and by the Danish Data Protection Agency (ID-2008-58-0035, 14.1.2015).

29  
30 311 All participants provided written informed consent.

31  
32  
33 312 **Funding:** The study was funded by Odense University Hospitals Research Foundation, The Region  
34  
35 313 of Southern Denmark, University of Southern Denmark, the Department of Gynaecology and  
36  
37 314 Obstetrics, Odense University Hospital, The A.P. Moeller Foundation for the Advancement of  
38  
39 315 Medical Science (grant no.13-93), and The Danish Association of Midwives. The funding sources  
40  
41  
42 316 had no influence or involvement in the study.

43  
44 317 **Data sharing:** Data are available upon reasonable request. Deidentified participant data are  
45  
46 318 available from the corresponding author by request: ditte.gommesen@rsyd.dk

47  
48  
49 319 **Figure 1:** Flowchart of inclusion and follow-up. Reasons for not participating in the clinical  
50  
51 320 examination: Withdrawal of consent/lost to follow-up; 111 women, moved away; 5 women, gave  
52  
53 321 birth again; 5 women, dead; 1 woman.

54  
55  
56  
57  
58  
59  
60

## References

1. Bossini L, Fortini V, Casolaro I, et al. [Sexual dysfunctions, psychiatric diseases and quality of life: a review]. *Psychiatria polska* 2014;48(4):715-26. [published Online First: 2014/10/16]
2. Lagaert L, Weyers S, Van Kerrebroeck H, et al. Postpartum dyspareunia and sexual functioning: a prospective cohort study. *The European journal of contraception & reproductive health care : the official journal of the European Society of Contraception* 2017;22(3):200-06. doi: 10.1080/13625187.2017.1315938 [published Online First: 2017/04/28]
3. Signorello LB, Harlow BL, Chekos AK, et al. Postpartum sexual functioning and its relationship to perineal trauma: a retrospective cohort study of primiparous women. *American journal of obstetrics and gynecology* 2001;184(5):881-8; discussion 88-90. doi: 10.1067/mob.2001.113855 [published Online First: 2001/04/17]
4. Buhling KJ, Schmidt S, Robinson JN, et al. Rate of dyspareunia after delivery in primiparae according to mode of delivery. *European journal of obstetrics, gynecology, and reproductive biology* 2006;124(1):42-6. doi: 10.1016/j.ejogrb.2005.04.008 [published Online First: 2005/07/19]
5. Barrett G, Pendry E, Peacock J, et al. Women's sexual health after childbirth. *BJOG : an international journal of obstetrics and gynaecology* 2000;107(2):186-95. [published Online First: 2000/02/25]
6. Connolly A, Thorp J, Pahel L. Effects of pregnancy and childbirth on postpartum sexual function: a longitudinal prospective study. *International urogynecology journal and pelvic floor dysfunction* 2005;16(4):263-7. doi: 10.1007/s00192-005-1293-6 [published Online First: 2005/04/20]
7. Serati M, Salvatore S, Siesto G, et al. Female sexual function during pregnancy and after childbirth. *The journal of sexual medicine* 2010;7(8):2782-90. doi: 10.1111/j.1743-6109.2010.01893.x [published Online First: 2010/07/16]
8. Radestad I, Olsson A, Nissen E, et al. Tears in the vagina, perineum, sphincter ani, and rectum and first sexual intercourse after childbirth: a nationwide follow-up. *Birth (Berkeley, Calif)* 2008;35(2):98-106. doi: 10.1111/j.1523-536X.2008.00222.x [published Online First: 2008/05/30]
9. McDonald EA, Gartland D, Small R, et al. Dyspareunia and childbirth: a prospective cohort study. *BJOG : an international journal of obstetrics and gynaecology* 2015;122(5):672-9. doi: 10.1111/1471-0528.13263 [published Online First: 2015/01/22]
10. Leeman L, Rogers R, Borders N, et al. The Effect of Perineal Lacerations on Pelvic Floor Function and Anatomy at 6 Months Postpartum in a Prospective Cohort of Nulliparous Women. *Birth (Berkeley, Calif)* 2016;43(4):293-302. doi: 10.1111/birt.12258 [published Online First: 2016/11/01]
11. Gommesen D, Nohr EA, Drue HC, et al. Obstetric perineal tears: risk factors, wound infection and dehiscence: a prospective cohort study. *Archives of gynecology and obstetrics* 2019 doi: 10.1007/s00404-019-05165-1 [published Online First: 2019/04/21]
12. Harris PA, Taylor R, Thielke R, et al. Research electronic data capture (REDCap)--a metadata-driven methodology and workflow process for providing translational research informatics support. *Journal of biomedical informatics* 2009;42(2):377-81. doi: 10.1016/j.jbi.2008.08.010 [published Online First: 2008/10/22]
13. Rogers RG, Coates KW, Kammerer-Doak D, et al. A short form of the Pelvic Organ Prolapse/Urinary Incontinence Sexual Questionnaire (PISQ-12). *International urogynecology journal and pelvic floor dysfunction* 2003;14(3):164-8; discussion 68. doi: 10.1007/s00192-003-1063-2 [published Online First: 2003/09/05]
14. Ducarme G, Hamel JF, Brun S, et al. Sexual function and postpartum depression 6 months after attempted operative vaginal delivery according to fetal head station: A prospective population-based cohort study. *PloS one* 2017;12(6):e0178915. doi: 10.1371/journal.pone.0178915 [published Online First: 2017/06/08]

1  
2  
3  
4  
5  
6  
7  
8  
9  
10  
11  
12  
13  
14  
15  
16  
17  
18  
19  
20  
21  
22  
23  
24  
25  
26  
27  
28  
29  
30  
31  
32  
33  
34  
35  
36  
37  
38  
39  
40  
41  
42  
43  
44  
45  
46  
47  
48  
49  
50  
51  
52  
53  
54  
55  
56  
57  
58  
59  
60

15. Brubaker L, Handa VL, Bradley CS, et al. Sexual function 6 months after first delivery. *Obstetrics and gynecology* 2008;111(5):1040-4. doi: 10.1097/AOG.0b013e318169cdee [published Online First: 2008/05/02]
16. Fernando RJS, A.H; Freeman, R.M; Williams, A.A; Adams, E.J;. The Management of Third- and Fourth-Degree Perineal Tears. RCOG Green-top Guideline No 29. London: Royal College of Obstetricians and Gynaecologists, 2015.
17. Bump RC, Mattiasson A, Bo K, et al. The standardization of terminology of female pelvic organ prolapse and pelvic floor dysfunction. *American journal of obstetrics and gynecology* 1996;175(1):10-7. [published Online First: 1996/07/01]
18. Textor J, Hardt J, Knuppel S. DAGitty: a graphical tool for analyzing causal diagrams. *Epidemiology (Cambridge, Mass)* 2011;22(5):745. doi: 10.1097/EDE.0b013e318225c2be [published Online First: 2011/08/04]
19. O'Malley D, Higgins A, Begley C, et al. Prevalence of and risk factors associated with sexual health issues in primiparous women at 6 and 12 months postpartum; a longitudinal prospective cohort study (the MAMMI study). *BMC pregnancy and childbirth* 2018;18(1):196. doi: 10.1186/s12884-018-1838-6 [published Online First: 2018/06/02]
20. Choi J, Shin DW, Lee S, et al. Dose-response relationship between cigarette smoking and female sexual dysfunction. *Obstetrics & gynecology science* 2015;58(4):302-8. doi: 10.5468/ogs.2015.58.4.302 [published Online First: 2015/07/29]
21. Cayan S, Akbay E, Bozlu M, et al. The prevalence of female sexual dysfunction and potential risk factors that may impair sexual function in Turkish women. *Urologia internationalis* 2004;72(1):52-7. doi: 10.1159/000075273 [published Online First: 2004/01/20]
22. Oksuz E, Malhan S. Prevalence and risk factors for female sexual dysfunction in Turkish women. *The Journal of urology* 2006;175(2):654-8; discussion 58. doi: 10.1016/s0022-5347(05)00149-7 [published Online First: 2006/01/13]
23. Sidi H, Puteh SE, Abdullah N, et al. The prevalence of sexual dysfunction and potential risk factors that may impair sexual function in Malaysian women. *The journal of sexual medicine* 2007;4(2):311-21. doi: 10.1111/j.1743-6109.2006.00319.x [published Online First: 2006/10/17]
24. Tziomalos K, Charsoulis F. Endocrine effects of tobacco smoking. *Clinical endocrinology* 2004;61(6):664-74. doi: 10.1111/j.1365-2265.2004.02161.x [published Online First: 2004/12/08]
25. Dennerstein L, Randolph J, Taffe J, et al. Hormones, mood, sexuality, and the menopausal transition. *Fertility and sterility* 2002;77 Suppl 4:S42-8. [published Online First: 2002/05/15]
26. Tennfjord MK, Hilde G, Staer-Jensen J, et al. Dyspareunia and pelvic floor muscle function before and during pregnancy and after childbirth. *International urogynecology journal* 2014;25(9):1227-35. doi: 10.1007/s00192-014-2373-2 [published Online First: 2014/04/02]
27. LaMarre AK, Paterson LQ, Gorzalka BB. Breastfeeding and postpartum maternal sexual functioning: a review. *The Canadian Journal of Human Sexuality* 2003;12:151+.
28. Matthies LM, Wallwiener M, Sohn C, et al. The influence of partnership quality and breastfeeding on postpartum female sexual function. *Arch Gynecol Obstet* 2019;299(1):69-77. doi: 10.1007/s00404-018-4925-z [published Online First: 2018/10/18]
29. Byrd JE, Hyde JS, DeLamater JD, et al. Sexuality during pregnancy and the year postpartum. *J Fam Pract* 1998;47(4):305-8. [published Online First: 1998/10/28]
30. Glazener CM. Sexual function after childbirth: women's experiences, persistent morbidity and lack of professional recognition. *British journal of obstetrics and gynaecology* 1997;104(3):330-5. [published Online First: 1997/03/01]
31. Sultan A, Thakar R, Fenner D. Perineal and Anal Sphincter Trauma. London, UK: Springer 2007.

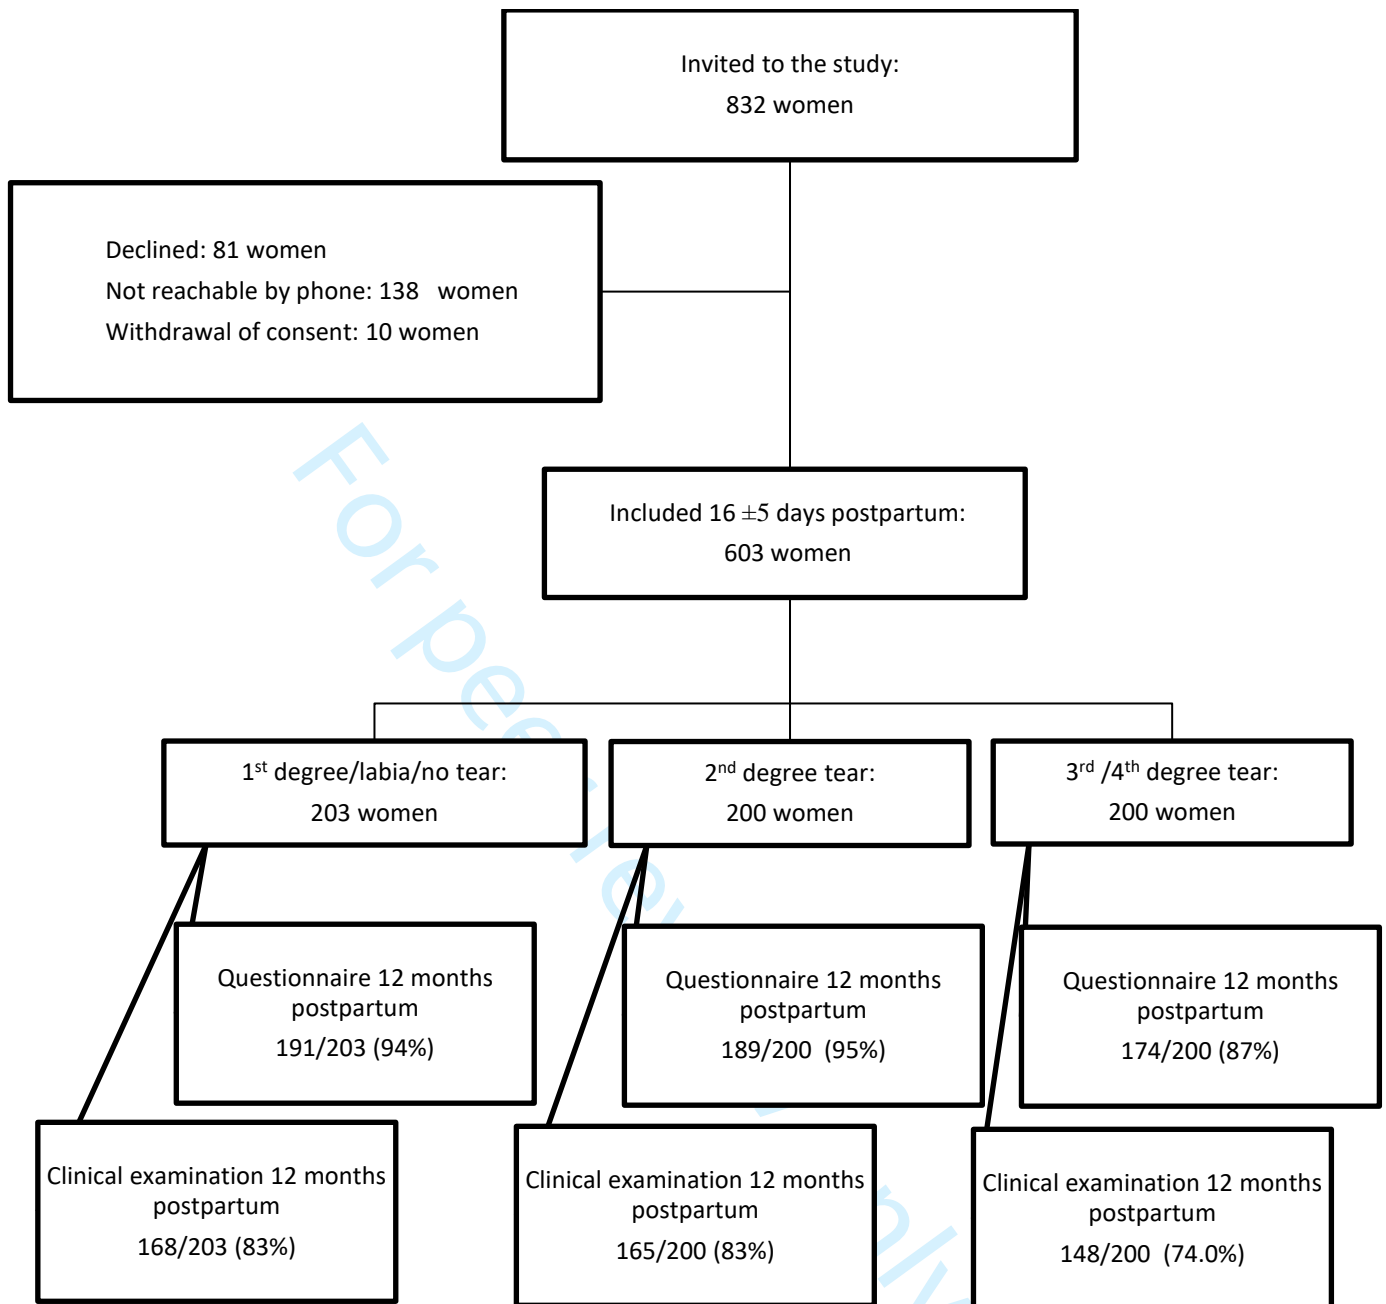

**Figure 1:** Flowchart of inclusion and follow-up. Reasons for not participating in the clinical examination: Withdrawal of consent/lost to follow-up; 111 women, moved away; 5 women, gave birth again; 5 women, dead; 1 woman.



STROBE Statement—Checklist of items that should be included in reports of *cohort studies*

|                              | Item No | Recommendation                                                                                                                                                                                                                                                                                                         | Page No      |
|------------------------------|---------|------------------------------------------------------------------------------------------------------------------------------------------------------------------------------------------------------------------------------------------------------------------------------------------------------------------------|--------------|
| <b>Title and abstract</b>    | 1       | (a) Indicate the study's design with a commonly used term in the title or the abstract<br>(b) Provide in the abstract an informative and balanced summary of what was done and what was found                                                                                                                          | 1<br>2-3     |
| <b>Introduction</b>          |         |                                                                                                                                                                                                                                                                                                                        |              |
| Background/rationale         | 2       | Explain the scientific background and rationale for the investigation being reported                                                                                                                                                                                                                                   | 4            |
| Objectives                   | 3       | State specific objectives, including any prespecified hypotheses                                                                                                                                                                                                                                                       | 4            |
| <b>Methods</b>               |         |                                                                                                                                                                                                                                                                                                                        |              |
| Study design                 | 4       | Present key elements of study design early in the paper                                                                                                                                                                                                                                                                | 4            |
| Setting                      | 5       | Describe the setting, locations, and relevant dates, including periods of recruitment, exposure, follow-up, and data collection                                                                                                                                                                                        | 4-5          |
| Participants                 | 6       | (a) Give the eligibility criteria, and the sources and methods of selection of participants. Describe methods of follow-up<br>(b) For matched studies, give matching criteria and number of exposed and unexposed                                                                                                      | 5-6<br>N/A   |
| Variables                    | 7       | Clearly define all outcomes, exposures, predictors, potential confounders, and effect modifiers. Give diagnostic criteria, if applicable                                                                                                                                                                               | 6-7          |
| Data sources/<br>measurement | 8*      | For each variable of interest, give sources of data and details of methods of assessment (measurement). Describe comparability of assessment methods if there is more than one group                                                                                                                                   | 6-7          |
| Bias                         | 9       | Describe any efforts to address potential sources of bias                                                                                                                                                                                                                                                              | 7-8          |
| Study size                   | 10      | Explain how the study size was arrived at                                                                                                                                                                                                                                                                              | 4            |
| Quantitative variables       | 11      | Explain how quantitative variables were handled in the analyses. If applicable, describe which groupings were chosen and why                                                                                                                                                                                           | 5-7          |
| Statistical methods          | 12      | (a) Describe all statistical methods, including those used to control for confounding<br>(b) Describe any methods used to examine subgroups and interactions<br>(c) Explain how missing data were addressed<br>(d) If applicable, explain how loss to follow-up was addressed<br>(e) Describe any sensitivity analyses | 7-8          |
| <b>Results</b>               |         |                                                                                                                                                                                                                                                                                                                        |              |
| Participants                 | 13*     | (a) Report numbers of individuals at each stage of study—eg numbers potentially eligible, examined for eligibility, confirmed eligible, included in the study, completing follow-up, and analysed<br>(b) Give reasons for non-participation at each stage<br>(c) Consider use of a flow diagram                        | 8            |
| Descriptive data             | 14*     | (a) Give characteristics of study participants (eg demographic, clinical, social) and information on exposures and potential confounders<br>(b) Indicate number of participants with missing data for each variable of interest<br>(c) Summarise follow-up time (eg, average and total amount)                         | Table 1, p.9 |
| Outcome data                 | 15*     | Report numbers of outcome events or summary measures over time                                                                                                                                                                                                                                                         | 10-15        |

|    |                          |    |                                                                                                                                                                                                              |       |
|----|--------------------------|----|--------------------------------------------------------------------------------------------------------------------------------------------------------------------------------------------------------------|-------|
| 1  | Main results             | 16 | (a) Give unadjusted estimates and, if applicable, confounder-adjusted estimates and their precision (eg, 95% confidence interval). Make clear which confounders were adjusted for and why they were included | 10-15 |
| 2  |                          |    | (b) Report category boundaries when continuous variables were categorized                                                                                                                                    |       |
| 3  |                          |    | (c) If relevant, consider translating estimates of relative risk into absolute risk for a meaningful time period                                                                                             |       |
| 4  |                          |    |                                                                                                                                                                                                              |       |
| 5  |                          |    |                                                                                                                                                                                                              |       |
| 6  |                          |    |                                                                                                                                                                                                              |       |
| 7  |                          |    |                                                                                                                                                                                                              |       |
| 8  |                          |    |                                                                                                                                                                                                              |       |
| 9  | Other analyses           | 17 | Report other analyses done—eg analyses of subgroups and interactions, and sensitivity analyses                                                                                                               |       |
| 10 |                          |    |                                                                                                                                                                                                              |       |
| 11 | <b>Discussion</b>        |    |                                                                                                                                                                                                              |       |
| 12 |                          |    |                                                                                                                                                                                                              |       |
| 13 | Key results              | 18 | Summarise key results with reference to study objectives                                                                                                                                                     | 18    |
| 14 | Limitations              | 19 | Discuss limitations of the study, taking into account sources of potential bias or imprecision. Discuss both direction and magnitude of any potential bias                                                   | 19-20 |
| 15 |                          |    |                                                                                                                                                                                                              |       |
| 16 | Interpretation           | 20 | Give a cautious overall interpretation of results considering objectives, limitations, multiplicity of analyses, results from similar studies, and other relevant evidence                                   | 18-21 |
| 17 |                          |    |                                                                                                                                                                                                              |       |
| 18 |                          |    |                                                                                                                                                                                                              |       |
| 19 | Generalisability         | 21 | Discuss the generalisability (external validity) of the study results                                                                                                                                        | 19-20 |
| 20 |                          |    |                                                                                                                                                                                                              |       |
| 21 | <b>Other information</b> |    |                                                                                                                                                                                                              |       |
| 22 |                          |    |                                                                                                                                                                                                              |       |
| 23 | Funding                  | 22 | Give the source of funding and the role of the funders for the present study and, if applicable, for the original study on which the present article is based                                                | 21    |
| 24 |                          |    |                                                                                                                                                                                                              |       |

\*Give information separately for exposed and unexposed groups.

**Note:** An Explanation and Elaboration article discusses each checklist item and gives methodological background and published examples of transparent reporting. The STROBE checklist is best used in conjunction with this article (freely available on the Web sites of PLoS Medicine at <http://www.plosmedicine.org/>, Annals of Internal Medicine at <http://www.annals.org/>, and Epidemiology at <http://www.epidem.com/>). Information on the STROBE Initiative is available at <http://www.strobe-statement.org>.



# BMJ Open

## Obstetric perineal tears, sexual function and dyspareunia among primiparous women 12 months postpartum: a prospective cohort study

|                                 |                                                                                                                                                                                                                                                                                                                                                                                                                                                                                                                                                                                |
|---------------------------------|--------------------------------------------------------------------------------------------------------------------------------------------------------------------------------------------------------------------------------------------------------------------------------------------------------------------------------------------------------------------------------------------------------------------------------------------------------------------------------------------------------------------------------------------------------------------------------|
| Journal:                        | <i>BMJ Open</i>                                                                                                                                                                                                                                                                                                                                                                                                                                                                                                                                                                |
| Manuscript ID                   | bmjopen-2019-032368.R2                                                                                                                                                                                                                                                                                                                                                                                                                                                                                                                                                         |
| Article Type:                   | Research                                                                                                                                                                                                                                                                                                                                                                                                                                                                                                                                                                       |
| Date Submitted by the Author:   | 08-Oct-2019                                                                                                                                                                                                                                                                                                                                                                                                                                                                                                                                                                    |
| Complete List of Authors:       | Gommesen, Ditte; University of Southern Denmark, Institute of Clinical Research; Odense University Hospital, Gynaecology and Obstetrics<br>Nøhr, Ellen; University of Southern Denmark, Institute of Clinical Research; Odense University Hospital, Gynaecology and Obstetrics<br>Qvist, Niels; University of Southern Denmark, Institute of Clinical Research; Odense University Hospital, Department of Gastroenterological Surgery<br>Rasch, Vibeke; Odense University Hospital, Gynaecology and Obstetrics; University of Southern Denmark, Institute of Clinical Research |
| <b>Primary Subject Heading</b>: | Sexual health                                                                                                                                                                                                                                                                                                                                                                                                                                                                                                                                                                  |
| Secondary Subject Heading:      | Obstetrics and gynaecology, Epidemiology                                                                                                                                                                                                                                                                                                                                                                                                                                                                                                                                       |
| Keywords:                       | EPIDEMIOLOGY, Urogynaecology < GYNAECOLOGY, Maternal medicine < OBSTETRICS, SEXUAL MEDICINE                                                                                                                                                                                                                                                                                                                                                                                                                                                                                    |
|                                 |                                                                                                                                                                                                                                                                                                                                                                                                                                                                                                                                                                                |

SCHOLARONE™  
Manuscripts

1  
2  
3  
4  
5  
6  
7  
8  
9  
10  
11  
12  
13  
14  
15  
16  
17  
18  
19  
20  
21  
22  
23  
24  
25  
26  
27  
28  
29  
30  
31  
32  
33  
34  
35  
36  
37  
38  
39  
40  
41  
42  
43  
44  
45  
46  
47  
48  
49  
50  
51  
52  
53  
54  
55  
56  
57  
58  
59  
60

1 **Full Title:** Obstetric perineal tears, sexual function and dyspareunia among primiparous women 12

2 months postpartum: a prospective cohort study

3

4 Ditte Gommesen, MHSc, Midwife and PhD student

5 Institute of Clinical Research, University of Southern Denmark

6 OPEN, Odense Patient data Explorative Network, Odense University Hospital

7 Department of Gynaecology and Obstetrics, Odense University Hospital

8 J.B. Winsløvs Vej 4, 5000 Odense C, Denmark

9

10 Ellen Aagaard Nohr, Professor and Consultant Midwife

11 Institute of Clinical Research, University of Southern Denmark

12 Department of Gynaecology and Obstetrics, Odense University Hospital

13 J.B. Winsløvs Vej 4, 5000 Odense C, Denmark

14

15 Niels Qvist, Professor and Senior Consultant

16 Institute of Clinical Research, University of Southern Denmark

17 Department of Gastroenterological Surgery, Odense University Hospital,

18 J.B. Winsløvs Vej 4, 5000 Odense C, Denmark

19

20 Vibeke Rasch, Professor and Senior Consultant

21 Institute of Clinical Research, University of Southern Denmark

22 Department of Gynaecology and Obstetrics, Odense University Hospital

23 J.B. Winsløvs Vej 4, 5000 Odense C, Denmark

24

1  
2  
3  
4 25 **Funding:** The study was funded by Odense University Hospitals Research Foundation, The Region  
5  
6 26 of Southern Denmark, University of Southern Denmark, the Department of Gynaecology and  
7  
8 27 Obstetrics, Odense University Hospital, The A.P. Moeller Foundation for the Advancement of  
9  
10 28 Medical Science (grant no.13-93), and **The Danish Association of Midwives**. The funding sources  
11  
12  
13 29 had no influence or involvement in the study.  
14  
15  
16 30

17  
18 31 **Correspondence:** Ditte Gommesen, Department of Gynaecology and Obstetrics, Odense  
19  
20 32 University Hospital, J.B. Winsløvs Vej 4, 5000 Odense C, Denmark.

21  
22  
23 33 Phone number: 0045 29419788

24  
25 34 Email [ditte.gommesen@rsyd.dk](mailto:ditte.gommesen@rsyd.dk)  
26  
27 35

28  
29 36 **Short running title:** Obstetric perineal tears, sexual function and dyspareunia.

30  
31 37 **Word count:** 2498 words  
32  
33  
34 38  
35  
36 39  
37  
38  
39  
40  
41  
42  
43  
44  
45  
46  
47  
48  
49  
50  
51  
52  
53  
54  
55  
56  
57  
58  
59  
60

## 40 ABSTRACT

41 **Objective:** Sexuality is an important aspect of human identity and contributes significantly to the  
42 quality of life in women as well as in men. Impairment in sexual health after vaginal delivery is a  
43 major concern for many women. We aimed to examine the association between degree of perineal  
44 tear and sexual function 12 months postpartum.

45 **Design:** A prospective cohort study

46 **Setting:** Four Danish hospitals between July 2015 and January 2019

47 **Participants:** A total of 554 primiparous women: 191 with no/labia/first-degree tears, 189 with  
48 second-degree tears, and 174 with third-/fourth-degree tears. Baseline data were obtained 2 weeks  
49 postpartum by a questionnaire and a clinical examination. Sexual function was evaluated 12 months  
50 postpartum by an electronic questionnaire (PISQ-12) and a clinical examination.

51 **Primary outcome measures:** Total PISQ-12 score and dyspareunia.

52 **Results:** Episiotomy was performed in 54 cases and 95 women had an operative vaginal delivery.  
53 The proportion of women with dyspareunia was: 25%, 38% and 53% of women with no/labia/first-  
54 degree, second-degree or third-/fourth-degree tears, respectively.

55 Compared to women with no/labia/first-degree tears, women with second degree or third- or fourth-  
56 degree tears had higher risk of dyspareunia (aRR 2.05; 95% CI 1.51-2.78 and aRR 2.09; 95% CI  
57 1.55-2.81, respectively). Women with third- or fourth-degree tears had a higher mean PISQ-12  
58 score (12.2) than women with no/labia/first-degree tears (10.4)

59 **Conclusions:** Impairment of sexual health is common among primiparous women after vaginal  
60 delivery. At 12 months postpartum more than half of the women with an third- or fourth-degree tear  
61 experienced dyspareunia. Women delivering with no/labia/first-degree tears reported the best  
62 outcomes overall. Thus, it is important to minimize the extent of perineal trauma and to counsel  
63 about sexuality during and after pregnancy.

1  
2  
3  
4 645  
6 65 **Article summary**7  
8  
9  
10 66 Strengths and limitations of this study:

- 11
- 
- 12
- 
- 13 67 • The study had a high follow-up rate for both the web-based questionnaire and clinical
- 
- 14 68 examination.
- 
- 15 69
- 
- 16 70 • The study included both subjective and objective outcome measurements.
- 
- 17
- 
- 18
- 
- 19 71
- 
- 20 72 • All the clinical examinations were performed by the same examiner raising a possible risk of
- 
- 21 73 intra observer bias.
- 
- 22 74
- 
- 23 75
- 
- 24 76 • There was a risk of recall bias as information about pre-pregnancy sexual function was
- 
- 25 77 obtained postpartum.
- 
- 26 78

27  
28 78  
29  
30  
31  
32  
33  
34  
35  
36  
37  
38  
39  
40  
41  
42  
43  
44  
45  
46  
47  
48  
49  
50  
51  
52  
53  
54  
55  
56  
57  
58  
59  
60

## 79 INTRODUCTION

80 Sexuality is an important aspect of human identity and contributes significantly to the quality of life  
81 in women as well as in men.<sup>1</sup> Sexual function postpartum is affected by the changes in hormonal  
82 milieu, anatomy, and family structure following childbirth. Dyspareunia and other sexual problems  
83 such as loss of sex drive in the postpartum period is a well-known problem and frequencies of  
84 sexual health problems as high as 30-60% three months postpartum and 17-31% six months  
85 postpartum have been reported.<sup>2-7</sup> A large cohort study from Sweden found vaginal or perineal  
86 tears, regardless of degree, to be associated with a delay in women's resumption of sexual  
87 intercourse defined as more than 3 months after giving birth,<sup>8</sup> while about 10% of primiparous  
88 women had not yet resumed sexual intercourse six months postpartum.<sup>3</sup> The causes of sexual health  
89 problems are multifactorial and the mechanisms are still not fully understood.<sup>3-5 9</sup> Thus sexual  
90 health problems remains an unsolved problem for many women. Among other things, anatomical  
91 changes caused by vaginal or perineal tears may contribute to dyspareunia and has important effects  
92 on both the timing and quality of the resumption of sexual relations during the initial postpartum  
93 months.<sup>10</sup> The association between obstetrical risk factors and postpartum sexual function is not yet  
94 well described or understood and thus the aim of this study was to investigate the association  
95 between degree of perineal tear, sexual function and dyspareunia 12 months postpartum.

## 96 METHODS

### 97 Study setting

98 This study is part of a larger prospective cohort study conducted at two university and two tertiary  
99 hospital units in Denmark, Odense (OUH), Aarhus (AUH), Esbjerg, and Kolding, between July  
100 2015 and January 2019. The inclusion procedure and sample size calculation is described  
101 thoroughly elsewhere.<sup>11</sup>

### 102 Study population

1  
2  
3  
4 103 The study involved three groups of women i) 203 women with no/labia/first-degree perineal tears,  
5  
6 104 ii) 200 women with second-degree perineal tears and iii) 200 women with third-/fourth-degree  
7  
8  
9 105 perineal tears.

### 11 106 **Patient and Public Involvement**

12  
13 107 There was no patient or public involvement in design and conduct of this study.

### 16 108 **Inclusion and follow-up procedure**

17  
18 109 Women delivering vaginally, at least 18 years old, able to read and speak Danish were eligible.

19  
20 110 After the delivery, they were informed about the study. Further information was sent by e-mail and

21  
22 111 the women were invited by phone to participate in a face-to-face interview including baseline

23  
24 112 questionnaires and a clinical examination comprising a perineal inspection at 16±5 days

25  
26 113 postpartum. Written informed consent was obtained at baseline.<sup>11</sup> At 12 months postpartum, all

27  
28 114 participants received the same questionnaires electronically and were invited to a gynaecological

29  
30 115 examination. All examinations took place at the hospital and participants could bring their baby.

31  
32 116 Study data were collected and managed using REDCap electronic data capture tools hosted at

33  
34 117 OUH.<sup>12</sup>

### 39 118 **Outcome measurements**

40  
41 119 The primary outcome was sexual function. We used the Danish version of the Pelvic Organ

42  
43 120 Prolapse/Urinary Incontinence Sexual Function Questionnaire (PISQ-12).<sup>13</sup> The PISQ-12 is a self-

44  
45 121 administered, objective and validated questionnaire with scores based on 12 questions to evaluate

46  
47 122 sexual function. The score of each item ranges from 0=never to 4=always (reverse scoring for

48  
49 123 questions 1, 2, 3 and 4). Missing responses are handled by multiplying the mean of answered items

50  
51 124 and the score is valid with up to 2 missing answers.<sup>13</sup> The questionnaire has previously been used to

52  
53 125 evaluate sexual function after vaginal delivery.<sup>14 15</sup> We used the total score (range 0-48) with lower

54  
55 126 scores indicating better sexual function, and the individual score for question 5; "Do you feel pain

56  
57  
58  
59  
60

1  
2  
3  
4 127 during sexual intercourse?”. The total score was used as a continuous variable presented as mean  
5  
6  
7 128 and standard deviation (SD) and the single score for question 5 was dichotomized as dyspareunia  
8  
9 129 when answering “sometimes”, “usually” or “always” and no dyspareunia when answering “seldom”  
10  
11 130 or “never”.

### 13 131 **Exposure variables and covariates**

#### 16 132 **Degrees of perineal tears**

18 133 The degree of perineal tear was defined according to the Green-top Guideline No. 29.<sup>16</sup> First-degree  
19  
20 134 tears were defined as injury to perineal skin and/or vaginal mucosa. Second-degree tears were  
21  
22  
23 135 defined as injury to perineum involving perineal muscles but not the anal sphincter. Third- and  
24  
25 136 fourth-degree tears were defined as injury to perineum involving the anal sphincter complex.  
26  
27 137 Episiotomies were lateral or mediolateral. Episiotomies equivalent to a second-degree tear were  
28  
29  
30 138 analysed independently while episiotomies extending to the anal sphincter muscles were classified  
31  
32 139 as a third- or fourth-degree tear.

#### 34 140 **Baseline information**

36 141 At baseline 16±5 days postpartum, a questionnaire was completed providing information about age  
37  
38  
39 142 (years), height (centimetres), smoking status (yes/no), and pregestational BMI (kg/m<sup>2</sup>). Information  
40  
41 143 about pregnancy, birth and the postpartum period was obtained from the obstetric journal and  
42  
43 144 included diabetes mellitus (yes/no), length of active birth and length of the second stage of labour  
44  
45  
46 145 (minutes), operative delivery (yes/no), birthweight (gram) and head circumference (centimetres).  
47  
48 146 The PISQ-12 was likewise completed at baseline providing information about pre-pregnancy sexual  
49  
50 147 function. Question 5 was used and dichotomized as the postpartum score described previously.

#### 52 148 **Clinical examination 12 months postpartum**

54  
55 149 Perineal length was evaluated by a gynaecological examination. All procedures were done by the  
56  
57 150 first author (DG), with the women in the dorsal lithotomy position without bowel preparation. At  
58  
59  
60



1  
2  
3  
4 151 the gynaecological examination, perineal body length was measured in centimetres, from the  
5  
6  
7 152 hymen to the middle of anus during Valsalva manoeuvre as done in the Pelvic Organ  
8  
9 153 Quantification (POP-Q) system,<sup>17</sup> and used as a dichotomous variable ( $\leq 2$  cm/ $> 2$  cm).

## 11 154 **Statistical analyses**

12  
13 155 Baseline characteristics according to degree of tear were described as frequencies for categorical  
14  
15  
16 156 variables. To investigate the association between the degree of perineal tear and dyspareunia or  
17  
18 157 perineal body length, a relative risk regression by use of a generalized linear model with log-link  
19  
20 158 function and binomial distribution as statistical family was performed with estimates reported as  
21  
22  
23 159 relative risks (RR) with 95% confidence intervals (CI). To investigate the association between the  
24  
25 160 degree of perineal tear and sexual health problems measured as the total PISQ-12 score, a linear  
26  
27 161 regression was performed, and results presented as regression coefficients ( $\beta$ ) with 95% CI. In the  
28  
29  
30 162 adjusted analysis, we controlled for pre-pregnancy dyspareunia, smoking, diabetes and operative  
31  
32 163 delivery as categorical variables and age, BMI, duration of the second stage of labour, duration of  
33  
34 164 active birth and birthweight as continuous variables. These potential confounders were chosen a  
35  
36 165 priori based on directed acyclic graphs generated for the outcome variable using DAGitty v2.3 as  
37  
38  
39 166 graphical tool for analyzing the causal diagrams.<sup>18</sup> The analyses were carried out using STATA  
40  
41 167 statistical software version 15.0.

## 43 168 **RESULTS**

### 46 169 **Participants**

47  
48 170 Initially, a total of 832 women were invited to participate in the study (Figure 1). Of these, 81  
49  
50 171 declined and 138 could not be reached. This left 613 women completing a written consent and a  
51  
52  
53 172 baseline questionnaire who were booked for a clinical examination  $16 \pm 5$  days postpartum. Ten  
54  
55 173 women withdrew their consent. Thus, the study population comprised 603 women. At the one year  
56  
57 174 follow-up, 554 of the 603 women answered the web-based questionnaire corresponding to 92%, and  
58  
59  
60

1  
2  
3  
4  
5  
6  
7  
8  
9  
10  
11  
12  
13  
14  
15  
16  
17  
18  
19  
20  
21  
22  
23  
24  
25  
26  
27  
28  
29  
30  
31  
32  
33  
34  
35  
36  
37  
38  
39  
40  
41  
42  
43  
44  
45  
46  
47  
48  
49  
50  
51  
52  
53  
54  
55  
56  
57  
58  
59  
60

175 481 women had the clinical examination performed corresponding to 80%. Due to more than two  
176 missing answers, 13 women were excluded from analyses of total PISQ-12 score.

### 177 **Characteristics according to degree of tear**

178 Women sustaining third- or fourth-degree tears were on average 0.5 years older than women  
179 sustaining second-degree tears and 1.2 years older than women sustaining no/labia/first-degree tears  
180 (Table 1).

For peer review only

Table 1: Characteristics according to degree of tear among primiparous women (n=554).

|                                               | Total      | Group 1<br>(No/labia/<br>1 <sup>st</sup> degree) | Group 2<br>(2 <sup>nd</sup> degree) | Group 3<br>(3 <sup>rd</sup> /4 <sup>th</sup> degree) |
|-----------------------------------------------|------------|--------------------------------------------------|-------------------------------------|------------------------------------------------------|
|                                               | (n=554)    | (n=191)                                          | (n=189)                             | (n=174)                                              |
|                                               | n (%)      | n (%)                                            | n (%)                               | n (%)                                                |
| <b>BMI, pre-pregnancy (kg/m<sup>2</sup>)*</b> |            |                                                  |                                     |                                                      |
| <25                                           | 357 (64.6) | 128 (67.0)                                       | 116 (61.7)                          | 113 (64.9)                                           |
| 25-29.9                                       | 126 (22.8) | 41 (21.5)                                        | 46 (24.5)                           | 39 (22.4)                                            |
| ≥29.9                                         | 70 (12.7)  | 22 (11.5)                                        | 26 (13.8)                           | 22 (12.6)                                            |
| <b>Age at inclusion (years)</b>               |            |                                                  |                                     |                                                      |
| ≤25                                           | 141 (25.5) | 63 (33.0)                                        | 50 (26.5)                           | 28 (16.1)                                            |
| 26-30                                         | 278 (50.2) | 91 (47.6)                                        | 89 (47.1)                           | 98 (56.3)                                            |
| >30                                           | 135 (24.4) | 37 (19.4)                                        | 50 (26.5)                           | 48 (27.6)                                            |
| <b>Active birth duration (minutes)</b>        |            |                                                  |                                     |                                                      |
| <220                                          | 140 (25.3) | 69 (36.1)                                        | 46 (24.3)                           | 25 (14.4)                                            |
| 221-340                                       | 141 (25.5) | 45 (23.6)                                        | 53 (28.0)                           | 43 (24.7)                                            |
| 341-570                                       | 143 (25.8) | 50 (26.2)                                        | 49 (25.9)                           | 44 (25.3)                                            |
| >570                                          | 130 (23.5) | 27 (14.1)                                        | 41 (21.7)                           | 62 (35.6)                                            |
| <b>Second stage duration (minutes)</b>        |            |                                                  |                                     |                                                      |
| <16                                           | 109 (19.7) | 40 (20.9)                                        | 47 (24.9)                           | 22 (12.6)                                            |
| 16-30                                         | 187 (33.8) | 80 (41.9)                                        | 60 (31.8)                           | 47 (27.0)                                            |
| 31-45                                         | 89 (16.1)  | 31 (16.2)                                        | 27 (14.3)                           | 31 (17.8)                                            |
| >45                                           | 169 (30.5) | 40 (20.9)                                        | 55 (29.1)                           | 74 (42.5)                                            |
| <b>Birthweight (grams)</b>                    |            |                                                  |                                     |                                                      |
| <2999                                         | 76 (13.7)  | 39 (20.4)                                        | 23 (12.2)                           | 14 (8.1)                                             |
| 3000-3499                                     | 193 (34.8) | 69 (36.1)                                        | 81 (42.9)                           | 43 (24.7)                                            |
| 3500-3999                                     | 210 (37.9) | 64 (33.5)                                        | 65 (34.4)                           | 81 (46.6)                                            |
| ≥4000                                         | 75 (13.5)  | 19 (10.0)                                        | 20 (10.6)                           | 36 (20.7)                                            |
| <b>Head circumference (cm)**</b>              |            |                                                  |                                     |                                                      |
| <34                                           | 141 (25.5) | 58 (30.5)                                        | 52 (27.7)                           | 31 (17.8)                                            |
| 34                                            | 119 (21.6) | 45 (23.7)                                        | 37 (19.7)                           | 37 (21.3)                                            |
| 35                                            | 131 (23.7) | 35 (18.4)                                        | 53 (28.2)                           | 43 (24.7)                                            |
| >35                                           | 161 (29.2) | 52 (27.4)                                        | 46 (24.5)                           | 63 (36.2)                                            |
| <b>Pre-pregnancy dyspareunia (yes)</b>        | 107 (19.3) | 26 (13.6)                                        | 39 (20.6)                           | 42 (24.1)                                            |
| <b>Operative delivery (yes)</b>               | 95 (17.2)  | 6 (3.1)                                          | 29 (15.3)                           | 60 (34.5)                                            |
| <b>Episiotomi (yes)</b>                       | 54 (9.8)   | -                                                | 32 (16.9)                           | 22 (12.6)                                            |
| <b>Smoker, at inclusion (yes)*</b>            | 21 (3.8)   | 8 (4.2)                                          | 8 (4.2)                             | 5 (2.9)                                              |
| <b>Diabetes mellitus (yes)</b>                | 19 (3.4)   | 5 (2.6)                                          | 7 (3.7)                             | 7 (4.0)                                              |

\*One missing values, n=553

\*\*Two missing values, n=552

Moreover, a higher degree of tear was seen with higher birthweight, longer second stage of labour and longer duration of active birth. Instrumental delivery was more frequent among women with second-degree (15%) and third- or fourth-degree tears (34%) compared to women with no/labia/first-degree tears (3%).

1  
2  
3  
4  
5  
6  
7  
8  
9  
10  
11  
12  
13  
14  
15  
16  
17  
18  
19  
20  
21  
22  
23  
24  
25  
26  
27  
28  
29  
30  
31  
32  
33  
34  
35  
36  
37  
38  
39  
40  
41  
42  
43  
44  
45  
46  
47  
48  
49  
50  
51  
52  
53  
54  
55  
56  
57  
58  
59  
60

187 **Risk of sexual health problems and dyspareunia**

188 The proportion of pre-pregnancy dyspareunia was: 14%, 21%, and 24% in the no/labia/first-degree,  
189 second-degree and third- or fourth-degree tear groups, respectively (Table 1). At 12 months  
190 postpartum, the proportion in all three groups was higher than pre-pregnancy; 25%, 38% and 53%  
191 respectively.

192 The risks for dyspareunia at 12 months postpartum are presented in Table 2.

For peer review only

Table 2: Relative Risks for dyspareunia 12 months postpartum among primiparous women in Denmark (n=554).

|                                                           | Total<br>n=554<br>n | Dyspareunia            |                       | Crude |               | Adjusted* |               |
|-----------------------------------------------------------|---------------------|------------------------|-----------------------|-------|---------------|-----------|---------------|
|                                                           |                     | Yes<br>n= 211<br>n (%) | No<br>n= 343<br>n (%) | RR    | (95% CI)      | RR        | (95% CI)      |
| <b>Degree of tear</b>                                     |                     |                        |                       |       |               |           |               |
| No/labia/1 <sup>st</sup>                                  | 191                 | 47 (24.6)              | 144 (75.4)            | 1.00  | reference     | 1.00      | reference     |
| 2 <sup>nd</sup> (spontaneous)                             | 157                 | 59 (37.8)              | 97 (62.2)             | 1.53  | (1.11 - 2.10) | 2.05      | (1.51 - 2.78) |
| 2 <sup>nd</sup> (mediolateral episiotomy)                 | 32                  | 13 (40.6)              | 19 (59.4)             | 1.65  | (1.01 - 2.69) | 1.62      | (0.99 - 2.67) |
| 3 <sup>rd</sup> or 4 <sup>th</sup>                        | 174                 | 92 (52.9)              | 82 (47.1)             | 2.15  | (1.62 - 2.86) | 2.09      | (1.55 - 2.81) |
| <b>BMI, pre-pregnancy (kg/m<sup>2</sup>)**, mean (SD)</b> |                     |                        |                       |       | -             |           | -             |
| <25                                                       | 357                 | 140 (39.2)             | 217 (60.8)            | 1.00  | reference     | 1.00      | reference     |
| 25-29.9                                                   | 126                 | 50 (39.7)              | 76 (60.3)             | 1.01  | (0.79 - 1.30) | 1.05      | (0.82 - 1.36) |
| >29.9                                                     | 70                  | 21 (30.0)              | 49 (70.0)             | 0.77  | (0.52 - 1.12) | 0.82      | (0.56 - 1.19) |
| <b>Age at inclusion (years), mean (SD)</b>                |                     |                        |                       |       |               |           |               |
| ≤25                                                       | 141                 | 52 (36.9)              | 89 (63.1)             | 0.94  | (0.72 - 1.22) | 0.94      | (0.72 - 1.22) |
| 26-30                                                     | 278                 | 109 (39.2)             | 169 (60.8)            | 1.00  | reference     | 1.00      | reference     |
| >30                                                       | 135                 | 50 (37.0)              | 85 (63.0)             | 0.94  | (0.73 - 1.23) | 0.91      | (0.70 - 1.19) |
| <b>Active birth duration (minutes), mean (SD)</b>         |                     |                        |                       |       |               |           |               |
| <220                                                      | 140                 | 49 (35.0)              | 91 (65.0)             | 0.97  | (0.71 - 1.33) | 0.90      | (0.66 - 1.24) |
| 221-340                                                   | 141                 | 51 (36.2)              | 90 (63.8)             | 1.00  | reference     | 1.00      | reference     |
| 341-570                                                   | 143                 | 52 (36.4)              | 91 (63.6)             | 1.00  | (0.74 - 1.37) | 1.00      | (0.74 - 1.37) |
| >570                                                      | 130                 | 59 (45.4)              | 71 (54.6)             | 1.26  | (0.94 - 1.68) | 1.26      | (0.92 - 1.70) |
| <b>2nd stage duration (minutes), mean (SD)</b>            |                     |                        |                       |       |               |           |               |
| <16                                                       | 109                 | 34 (31.2)              | 75 (68.8)             | 0.82  | (0.59 - 1.15) | 0.80      | (0.57 - 1.12) |
| 16-30                                                     | 187                 | 71 (38.0)              | 116 (62.0)            | 1.00  | reference     | 1.00      | reference     |
| 31-45                                                     | 89                  | 29 (32.6)              | 60 (67.4)             | 0.86  | (0.60 - 1.22) | 0.86      | (0.61 - 1.23) |
| >45                                                       | 169                 | 77 (45.6)              | 92 (54.4)             | 1.20  | (0.94 - 1.54) | 1.15      | (0.88 - 1.52) |
| <b>Birthweight (grams), mean (SD)</b>                     |                     |                        |                       |       |               |           |               |
| <2999                                                     | 76                  | 31 (40.8)              | 45 (59.2)             | 1.05  | (0.76 - 1.45) | 1.09      | (0.79 - 1.51) |
| 3000-3499                                                 | 193                 | 75 (38.9)              | 118 (61.1)            | 1.00  | reference     | 1.00      | reference     |
| 3500-3999                                                 | 210                 | 82 (39.1)              | 128 (60.9)            | 1.01  | (0.79 - 1.28) | 0.96      | (0.75 - 1.22) |
| ≥4000                                                     | 75                  | 23 (30.7)              | 52 (69.3)             | 0.79  | (0.54 - 1.16) | 0.74      | (0.50 - 1.10) |

1  
2  
3  
4  
5  
6  
7  
8  
9  
10  
11  
12  
13  
14  
15  
16  
17  
18  
19  
20  
21  
22  
23  
24  
25  
26  
27  
28  
29  
30  
31  
32  
33  
34  
35  
36  
37  
38  
39  
40  
41  
42  
43  
44  
45  
46

|                                        |     |           |           |                    |                    |
|----------------------------------------|-----|-----------|-----------|--------------------|--------------------|
| <b>Pre-pregnancy dyspareunia (yes)</b> | 107 | 66 (31.3) | 41 (12.0) | 1.90 (1.56 - 2.32) | 1.79 (1.45 - 2.21) |
| <b>Operative delivery (yes)</b>        | 65  | 45 (47.4) | 50 (52.6) | 1.31 (1.03 - 1.67) | 1.18 (0.90 - 1.54) |
| <b>Smoker at inclusion (yes)**</b>     | 21  | 10 (47.6) | 11 (52.4) | 1.27 (0.80 - 2.01) | 1.31 (0.82 - 2.10) |
| <b>Diabetes (yes)</b>                  | 19  | 7 (36.8)  | 12 (63.2) | 0.97 (0.53 - 1.76) | 1.02 (0.56 - 1.88) |

RR; relative risk ratio, CI; confidence interval, SD; standard deviation, BMI; body mass index  
 \*\* Adjusted for; age, BMI , birthweight, 2nd stage duration, active birth duration, smoking, diabetes, operative delivery, pre-pregnancy dyspareunia  
 (2nd stage duration and active birth duration are not mutually adjusted for each other).  
 \*\*One missing value (n=553).

For peer review only

1  
2  
3  
4  
5  
6  
7  
8  
9  
10  
11  
12  
13  
14  
15  
16  
17  
18  
19  
20  
21  
22  
23  
24  
25  
26  
27  
28  
29  
30  
31  
32  
33  
34  
35  
36  
37  
38  
39  
40  
41  
42  
43  
44  
45  
46  
47  
48  
49  
50  
51  
52  
53  
54  
55  
56  
57  
58  
59  
60

195 Compared to women with no/labia/first-degree tears, women with third- or fourth-degree tears had  
196 higher risk of dyspareunia (aRR 2.09; 1.55-2.81), as did women with spontaneous second-degree  
197 tears (aRR 2.05; 1.51-2.78). Further, we found pre-pregnancy dyspareunia to be associated with  
198 postpartum dyspareunia (aRR 1.79; 1.45-2.21).  
199 At 12 months postpartum the mean PISQ-12 score was higher among women with third- or fourth-  
200 degree tears (12.2) than among women with no/labia/first-degree tears (10.4) (Table 3).

For peer review only

Table 3: Risk for sexual health problems 12 months postpartum among primiparous women in Denmark (n=541).

|                                                   | Total<br>n=541 |            | PISQ-12 score* |                | Adjusted** |                |
|---------------------------------------------------|----------------|------------|----------------|----------------|------------|----------------|
|                                                   | n              | mean (SD)  | Crude<br>coef. | (95% CI)       | coef.      | (95% CI)       |
| <b>Degree of tear</b>                             |                |            |                |                |            |                |
| No/labia/1 <sup>st</sup>                          | 188            | 10.4 (4.2) | 0              | reference      | 0          | reference      |
| 2 <sup>nd</sup> (spontaneous)                     | 153            | 10.7 (5.1) | 0.37           | (-0.65 - 1.38) | 0.21       | (-0.81 - 1.22) |
| 2 <sup>nd</sup> (mediolateral episiotomy)         | 31             | 11.2 (4.2) | 0.81           | (-0.95 - 2.56) | 0.67       | (-1.13 - 2.46) |
| 3rd or 4th                                        | 169            | 12.1 (5.0) | 1.80           | (0.81 - 2.78)  | 1.69       | (0.61 - 2.76)  |
| <b>BMI (kg/m<sup>2</sup>)***, mean (SD)</b>       |                |            |                |                |            |                |
| <25                                               | 349            | 11.2 (4.7) | 0              | reference      | 0          | reference      |
| 25-29.9                                           | 121            | 10.8 (4.8) | -0.44          | (-1.43 - 0.56) | -0.23      | (-1.22 - 0.76) |
| >29.9                                             | 70             | 10.6 (5.4) | -0.60          | (-1.83 - 0.64) | -0.51      | (-1.74 - 0.72) |
| <b>Age (years), mean (SD)</b>                     |                |            |                |                |            |                |
| ≤25                                               | 137            | 11.2 (5.1) | 0.45           | (-0.53 - 1.44) | 0.49       | (-0.49 - 1.47) |
| 26-30                                             | 270            | 10.8 (4.7) | 0              | reference      | 0          | reference      |
| >30                                               | 134            | 11.5 (4.6) | 0.67           | (-0.32 - 1.67) | 0.61       | (-0.37 - 1.59) |
| <b>Active birth duration (minutes), mean (SD)</b> |                |            |                |                |            |                |
| <220                                              | 137            | 10.9 (4.5) | -0.22          | (-1.35 - 0.91) | -0.24      | (-1.27 - 0.79) |
| 221-340                                           | 139            | 11.1 (5.5) | 0              | reference      | 0          | reference      |
| 341-570                                           | 140            | 10.7 (4.4) | -0.46          | (-1.58 - 0.67) | -0.55      | (-1.57 - 0.47) |
| >570                                              | 125            | 11.6 (4.7) | 0.51           | (-0.65 - 1.67) | 0.09       | (-1.01 - 1.19) |
| <b>Second stage duration (minutes), mean (SD)</b> |                |            |                |                |            |                |
| <16                                               | 109            | 10.9 (5.0) | -0.22          | (-1.36 - 0.92) | -0.30      | (-1.44 - 0.84) |
| 16-30                                             | 181            | 11.1 (4.9) | 0              | reference      | 0          | reference      |
| 31-45                                             | 87             | 10.5 (4.4) | -0.60          | (-1.83 - 0.62) | -0.76      | (-1.98 - 0.46) |
| >45                                               | 164            | 11.5 (4.8) | 0.37           | (-0.64 - 1.39) | 0.05       | (-1.00 - 1.11) |
| <b>Birthweight (grams), mean (SD)</b>             |                |            |                |                |            |                |
| <2999                                             | 75             | 12.3 (4.9) | 1.13           | (-0.14 - 2.41) | 0.99       | (-0.27 - 2.27) |
| 3000-3499                                         | 191            | 11.2 (4.6) | 0              | reference      | 0          | reference      |
| 3500-3999                                         | 205            | 10.5 (4.8) | -0.66          | (-1.60 - 0.28) | -0.73      | (-1.68 - 0.21) |
| ≥4000                                             | 70             | 11.2 (5.1) | 0.08           | (-1.23 - 1.38) | 0.20       | (-1.10 - 1.51) |



|                                        |     |            |      |                |       |                |
|----------------------------------------|-----|------------|------|----------------|-------|----------------|
| <b>Pre-pregnancy dyspareunia (yes)</b> | 104 | 13.0 (4.6) | 2.44 | (1.43 - 3.44)  | 2.45  | (1.44 - 3.46)  |
| <b>Operative delivery (yes)</b>        | 92  | 11.7 (4.7) | 0.69 | (-0.38 - 1.76) | 0.46  | (-0.72 - 1.63) |
| <b>Smoker at inclusion (yes)***</b>    | 21  | 13.8 (4.9) | 2.78 | (0.70 - 4.86)  | 2.99  | (0.93 - 5.06)  |
| <b>Diabetes (yes)</b>                  | 19  | 11.1 (4.9) | 0.00 | (-2.19 - 2.20) | -0.09 | (-2.27 - 2.09) |

RR; relative risk ratio, CI; confidence interval, SD; standard deviation

\*PISQ-12 score; Pelvic Organ Prolapse/Urinary Incontinence Sexual Function Questionnaire, range 0-48, higher score indicating higher degree of sexual health problems, n=13 not included in analyses because of > 2 missing answers in the questionnaire

\*\* Adjusted for; age, BMI, birthweight, duration of the second stage of labour, duration of active birth, pre-pregnancy dyspareunia, smoking, diabetes, operative delivery (2nd stage duration and active birth duration are not mutually adjusted for each other)

\*\*\*One missing value (n=540).

For peer review only

1  
2  
3  
4  
5  
6  
7  
8  
9  
10  
11  
12  
13  
14  
15  
16  
17  
18  
19  
20  
21  
22  
23  
24  
25  
26  
27  
28  
29  
30  
31  
32  
33  
34  
35  
36  
37  
38  
39  
40  
41  
42  
43  
44  
45  
46  
47  
48  
49  
50  
51  
52  
53  
54  
55  
56  
57  
58  
59  
60

204 After adjustment, women with anal sphincter tears had 1.69 points higher score (95% CI 0.61-2.76)  
205 compared to women with no/labia/first-degree tears. Women reporting pre-pregnancy dyspareunia  
206 had an average 2.45 point higher score (95% CI 1.44-3.46) compared to women without pre-  
207 pregnancy dyspareunia. Further, we found smoking women to have a higher PISQ-12 score  
208 compared to non-smoking women ( $\beta$  2.99; 0.93-5.06).

209 The relative risks for dyspareunia postpartum according to perineal body length are presented in  
210 Table 4.

211

For peer review only

Table 4: Risk for dyspareunia according to perineal body length 12 months postpartum among primiparous women in Denmark (n=481).

|                             | Total<br>n=481<br>n | Dyspareunia            |                       | Crude<br>RR<br>(95% CI) | Adjusted*<br>RR<br>(95% CI) |
|-----------------------------|---------------------|------------------------|-----------------------|-------------------------|-----------------------------|
|                             |                     | Yes<br>n= 182<br>n (%) | No<br>n= 285<br>n (%) |                         |                             |
| <b>Perineal body length</b> |                     |                        |                       |                         |                             |
| > 2 cm                      | 468                 | 182 (38.9)             | 286 (61.1)            | 1.00 reference          | 1.00 reference              |
| ≤ 2 cm                      | 13                  | 8 (61.5)               | 5 (38.5)              | 1.58 (1.02 - 2.47)      | 1.72 (1.10 - 2.71)          |

RR; relative risk ratio, CI; confidence interval, SD; standard deviation

\* Adjusted for; age, BMI, birthweight, 2nd stage duration, active birth duration, smoking, diabetes, operative delivery, pre-pregnancy dyspareunia, degree of tear

1  
2  
3  
4  
5  
6  
7  
8  
9  
10  
11  
12  
13  
14  
15  
16  
17  
18  
19  
20  
21  
22  
23  
24  
25  
26  
27  
28  
29  
30  
31  
32  
33  
34  
35  
36  
37  
38  
39  
40  
41  
42  
43  
44  
45  
46  
47  
48  
49  
50  
51  
52  
53  
54  
55  
56  
57  
58  
59  
60

213

214 We found women with a perineal body length  $\leq 2$  cm to be in higher risk of dyspareunia compared  
215 to women with a perineal body length  $> 2$ cm (aRR 1.72; 1.10-2.71).

## 216 DISCUSSION

### 217 Main Findings

218 At 12 months postpartum, more than half of the women who sustained anal sphincter tears had  
219 dyspareunia compared to one fourth in women with no/labia/first-degree tears. Women with anal  
220 sphincter tears had a higher degree of sexual health problems in general. In addition, we found  
221 women with perineal body length  $\leq 2$  cm to be in higher risk of dyspareunia.

### 222 Interpretation (in light of other evidence)

223 The literature on sexual function measured more than six months postpartum is in general sparse  
224 which makes it difficult to compare our results to those from other studies. Our study showed that  
225 primiparous women, regardless degree of tear, experienced high levels of sexual health problems  
226 postpartum in accordance with the findings from another large cohort study.<sup>3</sup> In line with other  
227 studies,<sup>3 5 19</sup> we found more women with second-degree tears to have dyspareunia compared to  
228 women with no or minor tears. The same studies found pre-pregnancy dyspareunia to be associated  
229 with postpartum dyspareunia.<sup>3 5 19</sup> We observed the same association, but the association between  
230 degree of perineal tear and postpartum dyspareunia, did not seem to be affected by the presence of  
231 dyspareunia before pregnancy.

232 Our study showed smoking women to have a higher PISQ-12 score than the non-smoking women.  
233 Studies addressing the association between smoking and female sexual health are few and results  
234 are inconsistent.<sup>20-23</sup> However, smoking has an anti-oestrogenic effect,<sup>24</sup> and low oestrogen levels  
235 are related to higher prevalence of sexual health problems among women.<sup>25</sup>

1  
2  
3  
4  
5  
6  
7  
8  
9  
10  
11  
12  
13  
14  
15  
16  
17  
18  
19  
20  
21  
22  
23  
24  
25  
26  
27  
28  
29  
30  
31  
32  
33  
34  
35  
36  
37  
38  
39  
40  
41  
42  
43  
44  
45  
46  
47  
48  
49  
50  
51  
52  
53  
54  
55  
56  
57  
58  
59  
60

236 There is limited knowledge on dyspareunia postpartum and the role of the pelvic floor muscles<sup>26</sup>.

237 To our knowledge, only one study including 177 women has investigated the relation between the  
238 perineal muscles and dyspareunia and found no association.<sup>26</sup> We found perineal length to be  
239 associated with the risk of dyspareunia. Thus more women with a short perineum had dyspareunia.

### 240 **Strengths and limitations**

241 The study had a high follow-up rate for both the web-based questionnaire and clinical examination.

242 A major strength of this study is the inclusion of only primiparous women. Hereby, we were able to  
243 assess the possible association between the degree of tear and the risk of sexual health problems  
244 without the influence of previous deliveries and tears. Further, the inclusion of a control group  
245 without perineal muscle tears made it possible to assess the effect of a vaginal delivery itself  
246 without tears to the perineal muscles. In addition, all women had a clinical examination two weeks  
247 postpartum and thereby the risk of misclassification according to exposure group was minimized.

248 A limitation of the present study is the fact that all clinical examinations were performed by the  
249 same examiner (DG). To limit differential misclassification, the examiner was blinded of the sexual  
250 function status of each participant and aimed to stay blinded to the degree of tear the women in  
251 question had sustained.

252 In the present study, we used the standardized and validated PISQ-12 questionnaire. However, the  
253 PISQ-12 questionnaire is developed and validated in populations of heterogeneous couples. The  
254 questions addressing partner erection and premature ejaculation are only relevant for women with a  
255 male partner. As the total PISQ-12 score depended on at least 10 answered questions, some women  
256 were excluded from these analyses based on their partner relationship. Thus, some of our results  
257 may only be relevant for heterosexual couples. The PISQ-12 score has biophysical focus in general  
258 and lacks the relational and psychological issues that may have an impact on postpartum sexual

1  
2  
3  
4  
5  
6  
7  
8  
9  
10  
11  
12  
13  
14  
15  
16  
17  
18  
19  
20  
21  
22  
23  
24  
25  
26  
27  
28  
29  
30  
31  
32  
33  
34  
35  
36  
37  
38  
39  
40  
41  
42  
43  
44  
45  
46  
47  
48  
49  
50  
51  
52  
53  
54  
55  
56  
57  
58  
59  
60

259 health. Thus, this study does not address these issues, which are highly relevant in the context of  
260 sexual health in a vulnerable period of life.

261 Other studies have found an association between sexual health problems and breastfeeding, as  
262 breastfeeding might fulfil parts of a woman`s need for proximity and lead to decreased oestrogen  
263 levels causing vaginal dryness.<sup>27-29</sup> We did not have information on breastfeeding. Yet, we have no  
264 reason to believe that breastfeeding should be unevenly distributed across degrees of perineal tears.  
265 In accordance with the results from a large Irish cohort study, we did not find episiotomies to be  
266 associated with sexual health problems 12 months postpartum.<sup>19</sup> In our primary adjusted analyses,  
267 we included episiotomy to adjust for any potential confounding effect. Excluding episiotomy from  
268 the analyses only changed the adjusted estimates marginally and thus episiotomy did not seem to be  
269 a confounder in this study.

270 We found 19.3% to report pre-pregnancy dyspareunia. However, pre-pregnancy information was  
271 obtained 2 weeks postpartum, which might have affected the precision of the recall. Ideally, sexual  
272 function should have been established before pregnancy but this would require another study  
273 design.

274

## **Clinical implications**

Although sexual problems are common one year after childbirth, especially among women sustaining tears of second-, third- or fourth-degree the proportion of women who ask for help or discuss their problems is low.<sup>5 30</sup> Thus, it is important to give words to the sexual well-being in the postpartum assessment of women and to put a particular focus on the women in high risk of developing sexual health problems. Further, pregnancy is a time in women's life when they are in contact with the health services. This provides an opportunity to identify and counsel women with dyspareunia as they are at risk of persistent sexual health problems 12 months postpartum.

If dyspareunia seem to be caused by vaginal dryness, local vaginal oestrogen or lubricants should be provided. If tender scar tissue is identified, perineal massage or use of lignocaine gel may be helpful,<sup>31</sup> and thus new mothers should be given these advises.

## **Conclusion**

The findings from this cohort study of primiparous women demonstrate that impairment of sexual health is common among primiparous women after vaginal delivery. Women delivering with no tears, tears isolated to the labia or small tears of first-degree reported the best outcomes overall, while more than half of the women with anal sphincter tears were experiencing dyspareunia. It is therefore important to minimize the extent of perineal trauma and to thoroughly counsel women and their partners about sexuality before, during and after pregnancy.

## **Disclosure of interests**

Nothing to declare

## **Contribution to Authorship**

All authors contributed to the design of this study. DG performed the data collection and conducted the analyses and DG, VR, EAN and NQ contributed to the interpretation of data. DG drafted the

1  
2  
3  
4  
5  
6  
7  
8  
9  
10  
11  
12  
13  
14  
15  
16  
17  
18  
19  
20  
21  
22  
23  
24  
25  
26  
27  
28  
29  
30  
31  
32  
33  
34  
35  
36  
37  
38  
39  
40  
41  
42  
43  
44  
45  
46  
47  
48  
49  
50  
51  
52  
53  
54  
55  
56  
57  
58  
59  
60

298 manuscript and all authors critically revised the manuscript and approved the version to be  
299 published.

### 300 **Data sharing**

301 Extra data is available by emailing the corresponding author.

### 302 **Details of ethics approval**

303 The study was approved by the Scientific Ethics Committee for the Region of Southern Denmark  
304 (S-20120213, 14.5.2013) and by the Danish Data Protection Agency (ID-2008-58-0035, 14.1.2015).

305 All participants provided written informed consent.

306 **Funding:** The study was funded by Odense University Hospitals Research Foundation, The Region  
307 of Southern Denmark, University of Southern Denmark, the Department of Gynaecology and  
308 Obstetrics, Odense University Hospital, The A.P. Moeller Foundation for the Advancement of  
309 Medical Science (grant no.13-93), and The Danish Association of Midwives. The funding sources  
310 had no influence or involvement in the study.

311 **Data sharing:** Data are available upon reasonable request. Deidentified participant data are  
312 available from the corresponding author by request: ditte.gommesen@rsyd.dk

313 **Figure 1:** Flowchart of inclusion and follow-up. Reasons for not participating in the clinical  
314 examination: Withdrawal of consent/lost to follow-up; 111 women, moved away; 5 women, gave  
315 birth again; 5 women, dead; 1 woman.



## References

1. Bossini L, Fortini V, Casolaro I, et al. [Sexual dysfunctions, psychiatric diseases and quality of life: a review]. *Psychiatria polska* 2014;48(4):715-26. [published Online First: 2014/10/16]
2. Lagaert L, Weyers S, Van Kerrebroeck H, et al. Postpartum dyspareunia and sexual functioning: a prospective cohort study. *The European journal of contraception & reproductive health care : the official journal of the European Society of Contraception* 2017;22(3):200-06. doi: 10.1080/13625187.2017.1315938 [published Online First: 2017/04/28]
3. Signorello LB, Harlow BL, Chekos AK, et al. Postpartum sexual functioning and its relationship to perineal trauma: a retrospective cohort study of primiparous women. *American journal of obstetrics and gynecology* 2001;184(5):881-8; discussion 88-90. doi: 10.1067/mob.2001.113855 [published Online First: 2001/04/17]
4. Buhling KJ, Schmidt S, Robinson JN, et al. Rate of dyspareunia after delivery in primiparae according to mode of delivery. *European journal of obstetrics, gynecology, and reproductive biology* 2006;124(1):42-6. doi: 10.1016/j.ejogrb.2005.04.008 [published Online First: 2005/07/19]
5. Barrett G, Pendry E, Peacock J, et al. Women's sexual health after childbirth. *BJOG : an international journal of obstetrics and gynaecology* 2000;107(2):186-95. [published Online First: 2000/02/25]
6. Connolly A, Thorp J, Pahel L. Effects of pregnancy and childbirth on postpartum sexual function: a longitudinal prospective study. *International urogynecology journal and pelvic floor dysfunction* 2005;16(4):263-7. doi: 10.1007/s00192-005-1293-6 [published Online First: 2005/04/20]
7. Serati M, Salvatore S, Siesto G, et al. Female sexual function during pregnancy and after childbirth. *The journal of sexual medicine* 2010;7(8):2782-90. doi: 10.1111/j.1743-6109.2010.01893.x [published Online First: 2010/07/16]
8. Radestad I, Olsson A, Nissen E, et al. Tears in the vagina, perineum, sphincter ani, and rectum and first sexual intercourse after childbirth: a nationwide follow-up. *Birth (Berkeley, Calif)* 2008;35(2):98-106. doi: 10.1111/j.1523-536X.2008.00222.x [published Online First: 2008/05/30]
9. McDonald EA, Gartland D, Small R, et al. Dyspareunia and childbirth: a prospective cohort study. *BJOG : an international journal of obstetrics and gynaecology* 2015;122(5):672-9. doi: 10.1111/1471-0528.13263 [published Online First: 2015/01/22]
10. Leeman L, Rogers R, Borders N, et al. The Effect of Perineal Lacerations on Pelvic Floor Function and Anatomy at 6 Months Postpartum in a Prospective Cohort of Nulliparous Women. *Birth (Berkeley, Calif)* 2016;43(4):293-302. doi: 10.1111/birt.12258 [published Online First: 2016/11/01]
11. Gommesen D, Nohr EA, Drue HC, et al. Obstetric perineal tears: risk factors, wound infection and dehiscence: a prospective cohort study. *Archives of gynecology and obstetrics* 2019 doi: 10.1007/s00404-019-05165-1 [published Online First: 2019/04/21]
12. Harris PA, Taylor R, Thielke R, et al. Research electronic data capture (REDCap)--a metadata-driven methodology and workflow process for providing translational research informatics support. *Journal of biomedical informatics* 2009;42(2):377-81. doi: 10.1016/j.jbi.2008.08.010 [published Online First: 2008/10/22]
13. Rogers RG, Coates KW, Kammerer-Doak D, et al. A short form of the Pelvic Organ Prolapse/Urinary Incontinence Sexual Questionnaire (PISQ-12). *International urogynecology journal and pelvic floor dysfunction* 2003;14(3):164-8; discussion 68. doi: 10.1007/s00192-003-1063-2 [published Online First: 2003/09/05]
14. Ducarme G, Hamel JF, Brun S, et al. Sexual function and postpartum depression 6 months after attempted operative vaginal delivery according to fetal head station: A prospective population-based cohort study. *PloS one* 2017;12(6):e0178915. doi: 10.1371/journal.pone.0178915 [published Online First: 2017/06/08]

1

2

3

4 362

5 363

6 364

7 365

8 366

9 367

10 368

11 369

12 370

13 371

14 372

15 373

16 374

17 375

18 376

19 377

20 378

21 379

22 380

23 381

24 382

25 383

26 384

27 385

28 386

29 387

30 388

31 389

32 390

33 391

34 392

35 393

36 394

37 395

38 396

39 397

40 398

41 399

42 400

43 401

44 402

45 403

46 404

47 405

48 406

49 407

50 408

51 409

52 410

53 411

54 412

55 413

56 414

57 415

58 416

59 417

60 418

15. Brubaker L, Handa VL, Bradley CS, et al. Sexual function 6 months after first delivery. *Obstetrics and gynecology* 2008;111(5):1040-4. doi: 10.1097/AOG.0b013e318169cdee [published Online First: 2008/05/02]
16. Fernando RJS, A.H; Freeman, R.M; Williams, A.A; Adams, E.J;. The Management of Third- and Fourth-Degree Perineal Tears. RCOG Green-top Guideline No 29. London: Royal College of Obstetricians and Gynaecologists, 2015.
17. Bump RC, Mattiasson A, Bo K, et al. The standardization of terminology of female pelvic organ prolapse and pelvic floor dysfunction. *American journal of obstetrics and gynecology* 1996;175(1):10-7. [published Online First: 1996/07/01]
18. Textor J, Hardt J, Knuppel S. DAGitty: a graphical tool for analyzing causal diagrams. *Epidemiology (Cambridge, Mass)* 2011;22(5):745. doi: 10.1097/EDE.0b013e318225c2be [published Online First: 2011/08/04]
19. O'Malley D, Higgins A, Begley C, et al. Prevalence of and risk factors associated with sexual health issues in primiparous women at 6 and 12 months postpartum; a longitudinal prospective cohort study (the MAMMI study). *BMC pregnancy and childbirth* 2018;18(1):196. doi: 10.1186/s12884-018-1838-6 [published Online First: 2018/06/02]
20. Choi J, Shin DW, Lee S, et al. Dose-response relationship between cigarette smoking and female sexual dysfunction. *Obstetrics & gynecology science* 2015;58(4):302-8. doi: 10.5468/ogs.2015.58.4.302 [published Online First: 2015/07/29]
21. Cayan S, Akbay E, Bozlu M, et al. The prevalence of female sexual dysfunction and potential risk factors that may impair sexual function in Turkish women. *Urologia internationalis* 2004;72(1):52-7. doi: 10.1159/000075273 [published Online First: 2004/01/20]
22. Oksuz E, Malhan S. Prevalence and risk factors for female sexual dysfunction in Turkish women. *The Journal of urology* 2006;175(2):654-8; discussion 58. doi: 10.1016/s0022-5347(05)00149-7 [published Online First: 2006/01/13]
23. Sidi H, Puteh SE, Abdullah N, et al. The prevalence of sexual dysfunction and potential risk factors that may impair sexual function in Malaysian women. *The journal of sexual medicine* 2007;4(2):311-21. doi: 10.1111/j.1743-6109.2006.00319.x [published Online First: 2006/10/17]
24. Tziomalos K, Charsoulis F. Endocrine effects of tobacco smoking. *Clinical endocrinology* 2004;61(6):664-74. doi: 10.1111/j.1365-2265.2004.02161.x [published Online First: 2004/12/08]
25. Dennerstein L, Randolph J, Taffe J, et al. Hormones, mood, sexuality, and the menopausal transition. *Fertility and sterility* 2002;77 Suppl 4:S42-8. [published Online First: 2002/05/15]
26. Tennfjord MK, Hilde G, Staer-Jensen J, et al. Dyspareunia and pelvic floor muscle function before and during pregnancy and after childbirth. *International urogynecology journal* 2014;25(9):1227-35. doi: 10.1007/s00192-014-2373-2 [published Online First: 2014/04/02]
27. LaMarre AK, Paterson LQ, Gorzalka BB. Breastfeeding and postpartum maternal sexual functioning: a review. *The Canadian Journal of Human Sexuality* 2003;12:151+.
28. Matthies LM, Wallwiener M, Sohn C, et al. The influence of partnership quality and breastfeeding on postpartum female sexual function. *Arch Gynecol Obstet* 2019;299(1):69-77. doi: 10.1007/s00404-018-4925-z [published Online First: 2018/10/18]
29. Byrd JE, Hyde JS, DeLamater JD, et al. Sexuality during pregnancy and the year postpartum. *J Fam Pract* 1998;47(4):305-8. [published Online First: 1998/10/28]
30. Glazener CM. Sexual function after childbirth: women's experiences, persistent morbidity and lack of professional recognition. *British journal of obstetrics and gynaecology* 1997;104(3):330-5. [published Online First: 1997/03/01]
31. Sultan A, Thakar R, Fenner D. Perineal and Anal Sphincter Trauma. London, UK: Springer 2007.



**Figure 1:** Flowchart of inclusion and follow-up. Reasons for not participating in the clinical examination: Withdrawal of consent/lost to follow-up; 111 women, moved away; 5 women, gave birth again; 5 women, dead; 1 woman.

STROBE Statement—Checklist of items that should be included in reports of *cohort studies*

|                              | Item No | Recommendation                                                                                                                                                                                                                                                                                                         | Page No      |
|------------------------------|---------|------------------------------------------------------------------------------------------------------------------------------------------------------------------------------------------------------------------------------------------------------------------------------------------------------------------------|--------------|
| <b>Title and abstract</b>    | 1       | (a) Indicate the study's design with a commonly used term in the title or the abstract<br>(b) Provide in the abstract an informative and balanced summary of what was done and what was found                                                                                                                          | 1<br>2-3     |
| <b>Introduction</b>          |         |                                                                                                                                                                                                                                                                                                                        |              |
| Background/rationale         | 2       | Explain the scientific background and rationale for the investigation being reported                                                                                                                                                                                                                                   | 4            |
| Objectives                   | 3       | State specific objectives, including any prespecified hypotheses                                                                                                                                                                                                                                                       | 4            |
| <b>Methods</b>               |         |                                                                                                                                                                                                                                                                                                                        |              |
| Study design                 | 4       | Present key elements of study design early in the paper                                                                                                                                                                                                                                                                | 4            |
| Setting                      | 5       | Describe the setting, locations, and relevant dates, including periods of recruitment, exposure, follow-up, and data collection                                                                                                                                                                                        | 4-5          |
| Participants                 | 6       | (a) Give the eligibility criteria, and the sources and methods of selection of participants. Describe methods of follow-up<br>(b) For matched studies, give matching criteria and number of exposed and unexposed                                                                                                      | 5-6<br>N/A   |
| Variables                    | 7       | Clearly define all outcomes, exposures, predictors, potential confounders, and effect modifiers. Give diagnostic criteria, if applicable                                                                                                                                                                               | 6-7          |
| Data sources/<br>measurement | 8*      | For each variable of interest, give sources of data and details of methods of assessment (measurement). Describe comparability of assessment methods if there is more than one group                                                                                                                                   | 6-7          |
| Bias                         | 9       | Describe any efforts to address potential sources of bias                                                                                                                                                                                                                                                              | 7-8          |
| Study size                   | 10      | Explain how the study size was arrived at                                                                                                                                                                                                                                                                              | 4            |
| Quantitative variables       | 11      | Explain how quantitative variables were handled in the analyses. If applicable, describe which groupings were chosen and why                                                                                                                                                                                           | 5-7          |
| Statistical methods          | 12      | (a) Describe all statistical methods, including those used to control for confounding<br>(b) Describe any methods used to examine subgroups and interactions<br>(c) Explain how missing data were addressed<br>(d) If applicable, explain how loss to follow-up was addressed<br>(e) Describe any sensitivity analyses | 7-8          |
| <b>Results</b>               |         |                                                                                                                                                                                                                                                                                                                        |              |
| Participants                 | 13*     | (a) Report numbers of individuals at each stage of study—eg numbers potentially eligible, examined for eligibility, confirmed eligible, included in the study, completing follow-up, and analysed<br>(b) Give reasons for non-participation at each stage<br>(c) Consider use of a flow diagram                        | 8            |
| Descriptive data             | 14*     | (a) Give characteristics of study participants (eg demographic, clinical, social) and information on exposures and potential confounders<br>(b) Indicate number of participants with missing data for each variable of interest<br>(c) Summarise follow-up time (eg, average and total amount)                         | Table 1, p.9 |
| Outcome data                 | 15*     | Report numbers of outcome events or summary measures over time                                                                                                                                                                                                                                                         | 10-15        |

|    |                          |    |                                                                                                                                                                                                              |       |
|----|--------------------------|----|--------------------------------------------------------------------------------------------------------------------------------------------------------------------------------------------------------------|-------|
| 1  | Main results             | 16 | (a) Give unadjusted estimates and, if applicable, confounder-adjusted estimates and their precision (eg, 95% confidence interval). Make clear which confounders were adjusted for and why they were included | 10-15 |
| 2  |                          |    | (b) Report category boundaries when continuous variables were categorized                                                                                                                                    |       |
| 3  |                          |    | (c) If relevant, consider translating estimates of relative risk into absolute risk for a meaningful time period                                                                                             |       |
| 4  |                          |    |                                                                                                                                                                                                              |       |
| 5  |                          |    |                                                                                                                                                                                                              |       |
| 6  |                          |    |                                                                                                                                                                                                              |       |
| 7  |                          |    |                                                                                                                                                                                                              |       |
| 8  |                          |    |                                                                                                                                                                                                              |       |
| 9  | Other analyses           | 17 | Report other analyses done—eg analyses of subgroups and interactions, and sensitivity analyses                                                                                                               |       |
| 10 |                          |    |                                                                                                                                                                                                              |       |
| 11 | <b>Discussion</b>        |    |                                                                                                                                                                                                              |       |
| 12 |                          |    |                                                                                                                                                                                                              |       |
| 13 | Key results              | 18 | Summarise key results with reference to study objectives                                                                                                                                                     | 18    |
| 14 | Limitations              | 19 | Discuss limitations of the study, taking into account sources of potential bias or imprecision. Discuss both direction and magnitude of any potential bias                                                   | 19-20 |
| 15 |                          |    |                                                                                                                                                                                                              |       |
| 16 | Interpretation           | 20 | Give a cautious overall interpretation of results considering objectives, limitations, multiplicity of analyses, results from similar studies, and other relevant evidence                                   | 18-21 |
| 17 |                          |    |                                                                                                                                                                                                              |       |
| 18 |                          |    |                                                                                                                                                                                                              |       |
| 19 | Generalisability         | 21 | Discuss the generalisability (external validity) of the study results                                                                                                                                        | 19-20 |
| 20 |                          |    |                                                                                                                                                                                                              |       |
| 21 | <b>Other information</b> |    |                                                                                                                                                                                                              |       |
| 22 |                          |    |                                                                                                                                                                                                              |       |
| 23 | Funding                  | 22 | Give the source of funding and the role of the funders for the present study and, if applicable, for the original study on which the present article is based                                                | 21    |
| 24 |                          |    |                                                                                                                                                                                                              |       |
| 25 |                          |    |                                                                                                                                                                                                              |       |

\*Give information separately for exposed and unexposed groups.

**Note:** An Explanation and Elaboration article discusses each checklist item and gives methodological background and published examples of transparent reporting. The STROBE checklist is best used in conjunction with this article (freely available on the Web sites of PLoS Medicine at <http://www.plosmedicine.org/>, Annals of Internal Medicine at <http://www.annals.org/>, and Epidemiology at <http://www.epidem.com/>). Information on the STROBE Initiative is available at <http://www.strobe-statement.org>.
